# 1 Transfer learning with randomized controlled trial data 2 for postprandial glucose prediction

3 Shinji Hotta <sup>1,2\*</sup>, Mikko Kytö <sup>3,4</sup>, Saira Koivusalo <sup>5</sup>, Seppo Heinonen <sup>6</sup>, Pekka Marttinen <sup>1</sup>

4 <sup>1</sup> Department of Computer Science, Aalto University, Espoo, Finland

5 <sup>2</sup> Fujitsu Limited, Kawasaki, Japan

6 <sup>3</sup> IT Management, Helsinki University Hospital, Helsinki, Finland

7 <sup>4</sup> Department of Computer Science, University of Helsinki, Helsinki, Finland

8 <sup>5</sup> Shared Group Services, Helsinki University Hospital, University of Helsinki, Helsinki, Finland

9 <sup>6</sup> Department of Obstetrics and Gynecology, Helsinki University Hospital, University of Helsinki, Helsinki, Finland

10 \* Corresponding author

11 Email: [hotta\\_s@fujitsu.com](mailto:hotta_s@fujitsu.com)

## 12 **Abstract**

13 In recent years, numerous methods have been introduced to predict glucose levels using machine-learning techniques on  
14 patients' daily behavioral and continuous glucose data. Nevertheless, a definitive consensus remains elusive regarding modeling  
15 the combined effects of diet and exercise for optimal glucose prediction. A notable challenge is the propensity for observational  
16 patient datasets from uncontrolled environments to overfit due to skewed feature distributions of target behaviors; for instance,  
17 diabetic patients seldom engage in high-intensity exercise post-meal. In this study, we introduce a unique Bayesian transfer  
18 learning framework using randomized controlled trial (RCT) data, primarily targeting postprandial glucose prediction. Initially,  
19 we gathered balanced training data from RCTs on healthy participants by randomizing behavioral conditions. Subsequently,  
20 we pretrained the model's parameter distribution using RCT data from the healthy cohort. This pretrained distribution was then  
21 adjusted, transferred, and utilized to determine the model parameters for each patient. Our framework's efficacy was appraised  
22 using data from 68 gestational diabetes mellitus patients in uncontrolled settings. The evaluation underscored the enhanced  
23 performance attained through our framework. Furthermore, when modeling the joint impact of diet and exercise, the synergetic  
24 model proved more precise than its additive counterpart.

## 25 **Introduction**

26 The global incidence of diabetes is on the rise, accompanied by escalating severity. This progression entails detrimental  
27 ramifications including compromised quality of life (QoL), multifarious complications, and costly surgical treatment.  
28 Projections indicate a staggering \$2.5 trillion global expenditure on diabetes-related medical costs by 2030 [1]. In light of this,  
29 there is an imperative to curtail these expenses while ameliorating QoL by proactively mitigating diabetes severity.

30 Recent national clinical guidelines [34] underscore a fundamental tenet of preventive intervention: the maintenance of blood  
31 glucose levels within the normative spectrum. A pivotal approach to achieving this control involves adopting a balanced  
32 lifestyle encompassing dietary measures, physical activity, and insulin therapy. Technological strides in continuous glucose  
33 monitoring (CGM) apparatus have empowered patients in managing glucose levels via mobile applications in the comfort of  
34 their homes, facilitating self-care [2,3]. However, mastering optimal behavioral adjustments for maintaining normoglycemia  
35 remains a challenge for patients [4]. Hence, a personalized framework is imperative, one that tailors recommendations for  
36 optimal individual behaviors, thereby ensuring the trajectory of future blood glucose levels aligns with the norm. This ambition  
37 necessitates the precise anticipation of how behavioral modifications will influence forthcoming blood glucose dynamics.

38 To date, various data-driven techniques for predicting glucose, incorporating behavioral factors, have emerged [5,6]. Prior  
39 literature primarily focused on dietary and exercise facets, employing time-series machine learning models like the  
40 autoregressive model [7] and long short-term memory (LSTM) [8] for glucose forecasting. Independent positive impacts on  
41 predictive accuracy have been demonstrated for dietary and exercise factors [6]. Yet, the synergy between these factors in  
42 achieving optimal prediction remains understudied. Recent clinical investigations [9-13] have illuminated that strategic  
43 synchronization of diet and exercise, such as moderate postprandial exercise, holds potential for further glucose reduction  
44 across diabetes profiles. However, the translation of these discoveries into predictive glucose modeling has remained uncharted.  
45 When considering the amalgamation of multiple behaviors, a critical hurdle is sidestepping overfitting in learning from an  
46 imbalanced patient dataset collected in unconstrained settings. Taking the instance of diet and exercise integration, the  
47 frequency of intermediate-level post-meal exercise tends to be notably lower than that of minimal or no post-meal exercise  
48 among gestational diabetes mellitus (GDM) patients leading their daily lives [38]. Consequently, an accurate estimation of the  
49 combined impact of postprandial exercise and diet becomes challenging due to sparse data on high-intensity postprandial  
50 exercise.

51 In recent years, an innovative solution has emerged to tackle data imbalance concerns by harnessing extensive patient data  
52 through transfer learning techniques [8,14-16]. This strategy thrives when the feature distributions of other patient data exhibit  
53 a range of values. Yet, when feature distribution across all patients is markedly imbalanced, the risk of extracting and  
54 transferring inaccurate insights escalates. Our preliminary analysis indeed revealed a pronounced imbalance in the feature  
55 distribution of postprandial exercises among 68 gestational diabetes mellitus (GDM) patients observed over 18 days (Fig 7(a)).  
56 This paper introduces a novel learning framework (Fig 1) that synergizes transfer learning with supplementary intervention  
57 data from a randomized controlled trial (RCT), harmonizing the distribution of behavioral features. This harmony is  
58 instrumental in predictive modeling of postprandial glucose involving dietary and exercise variables. The framework  
59 commences with an RCT, where behavioral conditions are randomized for a healthy cohort, amassing data with a balanced  
60 distribution. Subsequently, Bayesian parameter learning is executed on the prediction model utilizing the RCT data, yielding a  
61 dependable parameter distribution. Ultimately, this pre-trained distribution is judiciously rescaled and employed as a prior for  
62 each patient's parameter learning utilizing observational data from real-world scenarios. This ensures a robust knowledge  
63 transfer from the RCT domain, curtailing overfitting risks inherent in imbalanced patient data. Empirical validation underscores

64 the efficacy of this framework, as evidenced by enhanced prediction performance in postprandial glucose prognosis using an  
65 authentic GDM patient dataset.

66

67 **Fig 1. Overview of proposed transfer learning framework.**

68

## 69 **Related work**

### 70 **A. Integrative glucose prediction with diet and physical activity**

71 Numerous machine learning techniques incorporate dietary and exercise factors to anticipate blood glucose levels. Jankovic et  
72 al. [7] and Xie [17] introduced an autoregressive model, wherein carbohydrate intake influences and muscular energy  
73 expenditure-driven exercise effects independently impact glucose levels. Likewise, support vector regression [18] and a  
74 physiological model [19] have been advanced for glucose prediction by integrating time-varying dietary and exercise  
75 influences, as computed through ordinary differential equations.

76 However, these methodologies entail training predictive models using individual patient historical data collected in  
77 unconstrained settings. Yet, these uncontrolled data settings introduce model misspecifications. This stems from the inherent  
78 imbalance in dietary or exercise feature distribution, attributed to each patient's distinct and established lifestyle. Consequently,  
79 limitations in data volume per patient compound the issue.

### 80 **B. Glucose prediction with transfer learning**

81 The primary hurdle in blood glucose level prediction lies in the scarcity of both the quality and quantity of patient data necessary  
82 for robust model training. Particularly, sophisticated deep learning techniques demand substantial training data volumes. In  
83 recent times, various strategies employing transfer learning to address this challenge have emerged. Transfer learning endeavors  
84 to construct an apt model for a target domain (referred to as a target task) by extrapolating model knowledge acquired from  
85 other domain datasets (termed source tasks) [20].

86 For instance, Faruqui et al. [8] suggested an approach entailing initial model learning using population data from a patient  
87 group as a source task, followed by transferring the model for individual patient-specific learning. Other studies have filtered

88 a subset of population data based on its resemblance to a target patient, employing it as training data for either a source task [8]  
89 or a target task [15]. Furthermore, to facilitate knowledge sharing among patients, a multitasking learning strategy [21] was  
90 proposed, addressing individual model learning for all patients in parallel. Additionally, for harnessing data from diverse patient  
91 groups, adversarial transfer learning [14] was proposed, which pre-aligns feature presentations between patient groups.

92 Diverging from these approaches, the introduced framework (Fig 1) takes a distinct stance. Primarily, while prevailing methods  
93 seek to augment individual data volume by integrating other patient data, our approach focuses on enhancing observational  
94 data quality through leveraging data from randomized controlled trials (RCTs). Secondly, our framework stands apart by  
95 proactively intervening to procure high-quality data, with experimental conditions randomized based on the target model  
96 structure intended for learning.

97

## 98 **Methods**

99 In this section, we elucidate the problem's context, expound on the modeling of dietary and exercise impacts for postprandial  
100 glucose prediction, and subsequently detail the implementation of transfer learning utilizing the RCT dataset.

### 101 **A. Problem setting**

102 Our model is based on an interpretable Bayesian regression model, as shown in Fig 3. We aimed to develop a predictive model  
103 that integrates the intertwined influences of both diet and exercise. Consequently, our study concentrated on forecasting  
104 postprandial glucose levels within the context of concurrent dietary and exercise effects on blood glucose. The anticipation of  
105 postprandial glucose levels assumes paramount significance in furnishing optimal behavioral suggestions, given the consistent  
106 post-meal surge in glucose levels, prone to deviations from the norm [22,23].

107 Consider now postprandial glucose levels with regard to the patient's diet. When the start time of the diet is  $\tau^*$ , the target  
108 postprandial glucose level is represented as time series  $\mathbf{y}_{\tau^*+1:\tau^*+T}$  of the target patient. Because the glucose level within 1 h  
109 after a diet is of clinical importance, we set  $T = 90$  min. In addition, it is well known that carbohydrate intake (CI) increases  
110 glucose, energy expenditure (EE) from exercise lowers glucose immediately, and the features of CI [24] and EE [7] perform  
111 well for glucose prediction. Suppose, we have three types of observation variables from the patient: (i) the glucose level history  
112 before the diet  $\mathbf{y}_{1:\tau^*}^g$ , (ii) the CI sequence  $\mathbf{x}_{1:M}$  from the diet and the corresponding intake timing sequence  $\boldsymbol{\tau}_{\mathbf{x}_{1:M}}$ , and (iii) the EE

113 sequence  $\mathbf{z}_{1:N}$  from an exercise around a diet and the corresponding exercise timing sequence  $\boldsymbol{\tau}_{\mathbf{z}_{1:N}}$ .  $N$  and  $M$  denote the number  
114 of carbohydrate intakes and exercises, respectively, within one diet. Accordingly, as illustrated in Fig 2, we aim to solve a time-  
115 series regression problem to predict the target variable  $\mathbf{y}_{t^*+1:t^*+T}$  from observable variables  $\mathbf{y}_{1:t^*}^{\mathcal{H}}, \mathbf{x}_{1:M}, \mathbf{z}_{1:N}, \boldsymbol{\tau}_{\mathbf{x}_{1:M}}, \boldsymbol{\tau}_{\mathbf{z}_{1:N}}$ . In the  
116 following part, these observable variables are represented without the subscript such as  $\mathbf{y}, \mathbf{y}^{\mathcal{H}}, \mathbf{x}, \mathbf{z}, \boldsymbol{\tau}_x, \boldsymbol{\tau}_z$  respectively.

117

118 **Fig 2. Illustration of each variable for predicting postprandial glucose.**

119

## 120 **B. Bayesian predictive model for postprandial glucose**

121 Our model is based on an interpretable Bayesian regression model, as shown in Fig 3. This preference is rooted in the model's  
122 inherent transparency and traceability in contrast to complex machine learning constructs like LSTM. This transparency holds  
123 paramount significance in ensuring effective quality control for the model's real-world applications.

124

125 **Fig 3. Graphical model of postprandial glucose. Parameter sets of both healthy group and patient group are estimated**  
126 **separately with this same model.**

127 Following this approach, our model is based on a cutting-edge Bayesian model for glucose prediction [25], wherein  
128 forthcoming blood glucose levels are prognosticated as a summation of the time-series response under a treatment—like  
129 carbohydrate intake—and a baseline glucose level, with Gaussian noise introduced. Our study delves into two variants: an  
130 additive model and a synergistic model, both designed to account for combined effects. In the former, dietary and exercise  
131 responses are discretely generated and linearly aggregated, aligning with preceding research [7,17]. Conversely, the latter  
132 model embraces interdependency between dietary and exercise responses in a synergistic manner. This is substantiated by  
133 contemporary medical insights that highlight how the impact of postprandial exercise on glucose reduction is contingent upon  
134 carbohydrate intake levels [26] and the elevation in postprandial blood glucose [27]. Our supposition in the synergistic model  
135 postulates that such interactive impacts manifest through the multiplication of dietary and exercise effects. Furthermore, for  
136 performance benchmarking, we also explore a solitary-effect model relying solely on dietary effects, as previously addressed  
137 [25].

138 Specifically, the single-effect, additive-effect, and synergetic-effect models are represented by the following equations:

139

$$\mathbf{y} = y_{\text{base}} + \mathcal{R}_d(\mathbf{x}, \tau_x) + e \quad \#(1)$$

$$\mathbf{y} = y_{\text{base}} + \mathcal{R}_d(\mathbf{x}, \tau_x) + \mathcal{R}_e(\mathbf{z}, \tau_z) + e \quad \#(2)$$

$$\mathbf{y} = y_{\text{base}} + \mathcal{R}_d(\mathbf{x}, \tau_x) + \mathcal{R}_e(\mathbf{z}, \tau_z) + C\mathcal{R}_d(\mathbf{x}, \tau_x) \circ \mathcal{R}_e(\mathbf{z}, \tau_z) + e \quad \#(3)$$

140

141 where  $\mathbf{y}, \mathcal{R}_d$ , and  $\mathcal{R}_e$  are time series, and  $y_{\text{base}}$  represents the baseline blood glucose level, excluding the effects of diet and  
 142 exercise. Since the time range for focusing on postprandial blood glucose is quite short, we assume that  $y_{\text{base}}$  is constant and  
 143 substitute the median value of the history of preprandial blood glucose  $\mathbf{y}^{\mathcal{H}}$  from 15 min before the meal.  $\mathcal{R}_d$  indicates the  
 144 dietary effect of increasing glucose levels, and  $\mathcal{R}_e$  indicates the exercise effect of decreasing glucose levels.  $e$  represents the  
 145 Gaussian noise following  $N(0, \sigma)$ . Fig 3 shows a graphical representation of the synergistic model.

146 Furthermore,  $\mathcal{R}_d$  and  $\mathcal{R}_e$  are represented as time-series responses to each CI or EE treatment. Since patients occasionally have  
 147 successive meals within 90 min and often perform postprandial exercise multiple times,  $\mathcal{R}_d$  and  $\mathcal{R}_e$  are modeled as the  
 148 summation of responses for multiple treatments in the same way as below.

$$\mathcal{R}_d(\mathbf{x}, \tau_x) = \sum_{i=1}^N h_{d_i} \exp\left(\frac{-0.5(\Delta_i - 3\alpha_d)^2}{\alpha_d^2}\right), \quad h_{d_i} = \beta_d x_i, \quad \Delta_i = \mathbf{t} - \tau_{x,i} \quad \#(4)$$

$$\mathcal{R}_e(\mathbf{z}, \tau_z) = \sum_{j=1}^M h_{e_j} \exp\left(\frac{-0.5(\Delta_j - 3\alpha_e)^2}{\alpha_e^2}\right), \quad h_{e_j} = \beta_e z_j, \quad \Delta_j = \mathbf{t} - \tau_{z,j} \quad \#(5)$$

149

150 where  $N$  and  $M$  denote the numbers of meals and exercise sessions, respectively. Here, we adopt a bell-shaped function as the  
 151 response function, following [25], because of its interpretability and smaller number of parameters. In this function,  $\tau_{x,i}$  and  
 152  $\tau_{z,j}$  represent the times when CI and EE start to occur, respectively. In addition, the functions are amplified by the treatment  
 153 dose, that is, the amount of CI ( $x_i$ ) of  $i$ -th intake or the amount of EE ( $z_j$ ) of  $j$ -th exercise, for each.  $\beta_d$  and  $\beta_e$  are parameters

154 representing the strength of the above amplification for each treatment dose, while  $\alpha_d$  and  $\alpha_e$  are parameters representing the  
155 response speed to each treatment. Examples of  $\mathcal{R}_d$  and  $\mathcal{R}_e$  are shown in Fig 4. Furthermore, to enable synergistic effect model  
156 in Eqs. 3, we introduce the adjustment parameter  $C$  for weighting the synergetic effect represented by  $\mathcal{R}_d \circ \mathcal{R}_e$ , where  $\circ$  means  
157 the element-wise product.

158

159 **Fig 4. Illustration of dietary response (left) and exercise response (right) to glucose level.**

160 Each of these parameters is patient-specific. Moreover, we introduce a hierarchical prior distribution of patient-specific  
161 parameters, enabling stable parameter learning by sharing parameter knowledge across individuals. We assume this hierarchical  
162 prior follows Gaussian centered on  $\tilde{\Theta} = (\tilde{\alpha}_d, \tilde{\beta}_d, \tilde{\alpha}_e, \tilde{\beta}_e)$  for an additive model and  $\tilde{\Theta} = (\tilde{\alpha}_d, \tilde{\beta}_d, \tilde{\alpha}_e, \tilde{\beta}_e, \tilde{C})$  for a synergetic model.  
163 These hyperparameters are common to each person in the same group (healthy or patient group) and are learned for each group,  
164 as shown in Fig 3.

## 165 **C. Bayesian transfer learning with prior rescaling from RCT data**

166 Free-environment patient data are imbalanced in the distribution of the amount of each treatment (e.g., moderate-intensity  
167 exercise after a diet is significantly infrequent), which causes overfitting of the above hyperparameter set  $\tilde{\Theta}$ . To address this  
168 challenge, in our proposed framework, a hyperparameter set  $\tilde{\Theta}$  of patient group domain is learned through transfer learning  
169 with RCT data actively collected from healthy group domain.

170 Initially, we direct our attention towards enlisting healthy individuals as participants for the randomized controlled trial (RCT).  
171 This choice stems from their comparative acceptability to be intervened owing to fewer underlying health issues. To achieve  
172 balanced dose distributions for each treatment, data collection is structured to randomize treatment conditions systematically.  
173 Following this, leveraging the distributional insights garnered from the acquired RCT data, we facilitate effective learning  
174 within the patient group domain by applying and adapting the knowledge embedded in the learned hyperparameter set.

175 In addition, our target parameters of knowledge transfer are limited to only the exercise-related hyperparameter set  $\tilde{\Theta}_e = (\tilde{\alpha}_e,$   
176  $\tilde{\beta}_e, \tilde{C})$  from a set of  $\tilde{\Theta}$ , because the principle of the dietary effect to increase glucose differs between the diabetic group and the  
177 healthy group due to the significant difference in insulin sensitivity. In our RCT, we control only for the amount of exercise  
178 after the diets for each participant in the healthy group. The experimental procedure is described in the next section.



179 Based on the above premise, in the context of transfer learning, our source task is to learn the exercise-related hyperparameter  
180 set  $\tilde{\Theta}_e^{\mathbb{S}}$  in the healthy group domain with interventional data under RCT, and our target task is to learn the hyperparameter set  
181  $\tilde{\Theta}_e^{\mathbb{T}}$  in the diabetic group domain with observational data under free environments.

182 In this study, we adopt a comprehensive framework for prior rescaling as introduced by Xuan et al. [20] in the context of  
183 Bayesian Transfer Learning (BTL). This framework entails learning the probability distribution of parameters within the source  
184 task, subsequently rescaling this learned distribution, and employing it as an informative prior within the target task, as depicted  
185 in Fig 5(b). Pertaining to this rescaling process, a technique [28] was put forth, specifically addressing the scaling of variance  
186 parameters using pre-estimated coefficients for the target task, while preserving the mean parameter. Notably, adapting this  
187 framework to our specific challenges presents intricacies. To elucidate, the influence of exercise on glucose dynamics within  
188 the healthy cohort might diverge from that within the diabetic group. Evidently, differences in the efficacy of glucose uptake  
189 in leg muscle tissues between healthy and diabetic groups emerge [29]. Consequently, this underscores the need for a mean  
190 parameter shift operation for our cross-domain prior prior to rescaling.

191

192 **Fig 5. Extended framework for transfer learning. In each transfer method, only relationships between variables**  
193 **represented as bold line are used for parameter learning.**

194 In this context, we propose extending the general framework to robustly shift the mean of the pretrained distribution of the  
 195 parameter set  $\tilde{\Theta}_e$  based on clinical domain knowledge in prior rescaling, as shown in Fig 5(c). We aim to realize the distribution

$$\tilde{\Theta}_e^{\mathbb{T}} \sim N(\boldsymbol{\mu}^{\mathbb{T}}, \boldsymbol{\Sigma}^{\mathbb{T}}) \#(6)$$

$$\boldsymbol{\mu}^{\mathbb{T}} = \boldsymbol{\eta} \hat{\boldsymbol{\mu}}^{\mathbb{S}}, \boldsymbol{\Sigma}^{\mathbb{T}} = \boldsymbol{\lambda} \hat{\boldsymbol{\Sigma}}^{\mathbb{S}} \#(7)$$

196 shift by introducing a new adjustment parameter  $\boldsymbol{\eta}$  to modulate the mean of the parameter  $\tilde{\beta}_e$  representing the strength of the  
 197 exercise effect on the glucose trajectory. For this,  $\eta = 0.5$  is suitable because the experimental results in the Ref. [29] show that  
 198 the glucose uptake efficiency of the leg muscle in the diabetic group was about half that of the healthy group.  $\eta$  for the other  
 199 exercise effect parameters  $\tilde{\alpha}_e$  and  $\tilde{C}$  in  $\tilde{\Theta}_e$  are assumed to 1. Furthermore, another adjustment parameter  $\boldsymbol{\lambda}$  is introduced to  
 200 robustly stabilize this distribution shift in the actual training process, and this parameter  $\boldsymbol{\lambda}$  is used to reduce the variance of each  
 201 parameter. Adding this control prevents the overfitting triggered by imbalanced exercise data in the target domain. To manage  
 202 the uncertainty in setting  $\boldsymbol{\eta}$  and  $\boldsymbol{\lambda}$ , we introduce hyperpriors for these parameters. We then use Hierarchical Bayesian estimation  
 203 with the patient dataset to determine their optimal values. Based on this, prior rescaling for the target parameter set  $\tilde{\Theta}_e^{\mathbb{T}}$  in the  
 204 target task is represented by the following equation:

205

206 The parameter set  $\tilde{\Theta}_e$  follow Gaussian distribution with a diagonal matrix  $\boldsymbol{\Sigma}$  where a variance for each parameter element is  
 207 independent of each other. And  $\boldsymbol{\eta}$  follow Gaussian hyperprior where mean parameters correspond to 0.5 for  $\tilde{\beta}_e$  and 1 for others.  
 208 Also,  $\boldsymbol{\lambda}$  follow Gaussian hyperprior with setting mean parameter to 0.1 respectively. The learning process for practical  
 209 parameter learning is performed in two steps. The first step is we pre-train Gaussian parameters  $\boldsymbol{\mu}^{\mathbb{S}}, \boldsymbol{\Sigma}^{\mathbb{S}}$  for the distribution of  
 210  $\tilde{\Theta}_e^{\mathbb{S}}$  with RCT data in the source task. The second step is we rescale this estimand  $\hat{\boldsymbol{\mu}}^{\mathbb{S}}, \hat{\boldsymbol{\Sigma}}^{\mathbb{S}}$  as in E.q 7, and then we perform  
 211 learning all hyperparameter sets  $\tilde{\Theta}_e^{\mathbb{T}}, \tilde{\Theta}_d^{\mathbb{T}}$  with observational patient data, in conjunction with learning individual parameters  $\Theta_e^{\mathbb{T}}$   
 212  $, \Theta_d^{\mathbb{T}}$  for each diabetes patient. These parameter learnings are performed by executing a Markov Chain Monte Carlo (MCMC)  
 213 simulation with the No U-Turn Sampler implemented in RStan [35].

## 214 Experimental setup

215 This paper addresses two pivotal research questions.

- 216 (i) How should the utilization of an RCT dataset for transfer learning be structured to acquire a predictive glucose model  
217 from an imbalanced patient dataset?
- 218 (ii) How can the fusion of diet and exercise be effectively modeled to optimize the prognostication of postprandial glucose  
219 levels?

220 To answer these questions, we built multiple patterns of predictive models with multiple patterns of transfer learning and  
221 compared their performance based on dedicated metrics using a real-world clinical dataset of GDM patients.

## 222 **A. Evaluation policy**

223 First, for question (i), we compared the performance of each predictive model built with and without normal or extended  
224 transfer learning described in ‘Methods B’ subsection. Second, for question (ii), we evaluated and compared the performance  
225 of the single effect model [25], the additive model, and the synergetic model described in ‘Methods A’ as a predictive model.  
226 Finally, we compared the performance of the following seven models:

- 227 •  $\mathcal{M}_{base}$  : Single-effect model
- 228 •  $\mathcal{M}_{add}$  : Additive model without transfer learning
- 229 •  $\mathcal{M}_{syn}$  : Synergistic model without transfer learning
- 230 •  $\mathcal{M}_{add+trans}$  : additive model with normal transfer learning
- 231 •  $\mathcal{M}_{syn+trans}$  : Synergistic model with normal transfer learning
- 232 •  $\mathcal{M}_{add+trans_{ext}}$  : additive model with extended transfer learning
- 233 •  $\mathcal{M}_{syn+trans_{ext}}$  : Synergistic model with extended transfer learning

234 In cases without transfer learning, we substituted a non-informative prior for the hyperparameter set  $\tilde{\Theta}_e^{\mathbb{T}}$ . Notably, for any  
235 model pattern, knowledge of exercise-related parameters is still shared among all patients in learning through the hierarchical  
236 prior (‘Methods A’ subsection). Furthermore, note the additive model has limited exercise-related parameters  $\tilde{\Theta}_e = (\tilde{\alpha}_e, \tilde{\beta}_e)$   
237 which are a subset of the parameters of the synergetic model (See Eq. 2 and 5).

## 238 **B. Clinical data**

239 The clinical data used for our performance evaluation were from a real-world free-environmental dataset of 72 patients with  
240 GDM, including continuous glucose levels, physical activity levels, and dietary records. This dataset, sourced from real-world

241 environments, emerged from a clinical trial orchestrated by the authors [4]. This trial was granted ethical sanction by the Ethics  
242 Committee of Helsinki and the Uusimaa University Hospital District. The recruitment effort targeted patients with GDM within  
243 the gestational window of 24–28 weeks, sourced from maternity clinics in the Helsinki metropolitan area between March 10 in  
244 2021 and December 12 in 2022. Written informed consent was obtained from all patients, and from both parents on behalf of  
245 the infant. Data acquisition occurred across 3-day intervals in monthly sessions leading up to childbirth. It's important to note  
246 that this analysis represents a secondary examination of the eMoM GDM study [4].

247 Throughout each session, a continuous glucose monitoring (CGM) system (Guardian Connect System, Medtronic Ltd.)  
248 facilitated 5-minute interval glucose tracking for every patient, illustrated in Fig 6. Concurrently, data related to physical  
249 activity were collected through a wrist-worn activity tracker (Vivosmart3, Garmin International Ltd.). Energy expenditure  
250 during exercise was automatically computed via the tracker. Dietary information encompassed nutrient quantities, including  
251 carbohydrate intake (CI), ingested at each temporal juncture, sourced from patients' manual food logs via a food tracking  
252 application developed by Helsinki University Hospital. Nutritional data integrity was fortified through nutritionist validation  
253 calls. Further information on the experimental protocol can be found in [4].

254

255 **Fig 6. Demonstration of train and test data in a 3-days session.**

## 256 **C. Preprocessing**

257 Given our focus on postprandial blood glucose as the prediction target, we partitioned the continuous glucose data and  
258 accompanying variables around each mealtime, as depicted in Fig 6. Each segment encompassed a time span of 15 minutes  
259 preceding a meal, extending to 90 minutes post-meal. Segments with absent continuous glucose data were omitted from  
260 analysis, leading to the exclusion of 4 patient datasets. As a result, 1619 segment of data were obtained from 68 patients.  
261 Subsequently, the segment data in the first two days of each session were used as the training data  $\mathcal{D}_{train}^T$ , and the segment data  
262 in the last day were used as the test data  $\mathcal{D}_{test}^T$ . The predictive model was trained in each session and its evaluation was  
263 performed within that session. This is because the segment data of the next month's session are heterogeneous from that of the  
264 current month, as the condition of a pregnant woman changes drastically after one month, even for the same individual [39].

## 265 **D. Randomized controlled trial**

266 The RCT data for our source task were collected from additionally recruited 4 healthy subjects (Aalto University students) in  
267 a six-days session with the same data collection as that in the clinical trial. The recruitment period was from February 1 in 2023  
268 to April 30 in 2023. Written informed consent was obtained from all the participants for data collection and utilization. The  
269 purpose of the RCT was to obtain a segmented dataset in which the distribution of EE during postprandial exercise enables  
270 robust learning of the exercise-related parameter set  $\tilde{\Theta}_e^S$ . Therefore, the postprandial exercise conditions during data collection  
271 were randomized for each participant. In practice, the subjects were instructed to follow different conditions, as follows (See  
272 Fig 1).

273 • **Low-intensity condition (Day 1 & Day 4)**

- 274     ▪ Eat almost same amount of carbohydrate at lunch (or dinner)
- 275     ▪ Don't perform an exercise until two hours after eating.

276 • **Moderate-intensity condition (Day 2 & Day 5)**

- 277     ▪ Eat almost same amount of carbohydrate at lunch (or dinner)
- 278     ▪ 30 minutes after starting eating, walk continuously at a pace of 100 step/min for 20 minutes.
- 279     ▪ After walking, don't perform an exercise until two hours after eating.

280 • **High-intensity condition (Day 3 & Day 6)**

- 281     ▪ Eat almost same amount of carbohydrate at lunch (or dinner)
- 282     ▪ 30 minutes after starting eating, walk continuously at a pace of 130 step/min for 20 minutes.
- 283     ▪ After walking, don't perform an exercise until two hours after eating.

284 The above exercise conditions were designed based on clinical findings of the effect of exercise on glucose. Specifically,  
285 according to the literature [30], the appropriate timing of exercise for decreasing blood glucose was reported to be 30 min after  
286 the start of meals, when the exercise content was continuous walking for 20 min.

287 While the exercise condition differed between the days, the dietary condition was controlled to be the same for all days for  
288 each subject, as shown in Fig 1. This is because by equalizing the dietary effect on postprandial glucose among all days in a  
289 subject, the learning of targeted exercise parameter sets  $\tilde{\Theta}_e^S$  can be facilitated more in our source task. Additionally, the  
290 participants were asked to choose breakfast or lunch as the target diet for each day.

291 The RCT and data preprocessing resulted in 24 segments of data  $\mathcal{D}_{train}^S$ . Fig 7 shows the actual distribution of the EE in the  
292 interventional RCT and observational GDM datasets. This confirms lesser imbalance in the distribution from the RCT dataset  
293 compared to that from the GDM dataset.

294

295 **Fig 7. Actual distribution of energy expenditure (EE) in postprandial exercise.**

## 296 **E. Parameter learning and prediction**

297 The posterior of the overall parameter sets involved in each model among the seven patterns was estimated by MCMC  
298 simulation using both the observational training data  $\mathcal{D}_{train}^T$  of the GDM group and the interventional RCT data  $\mathcal{D}_{train}^S$  of the  
299 healthy group. Subsequently, we obtained the point estimation values  $\hat{\theta}_e^T, \hat{\theta}_d^T$  which are a set of a posteriori medians for each  
300 parameter for each patient. Then, the predicted future postprandial glucose trajectory  $\hat{y}_{\tau'+1:\tau'+T}$  was obtained by applying the  
301 model embedded with  $\hat{\theta}_e^T, \hat{\theta}_d^T$  to the observed variable values  $y^{Jf}, x, z, \tau_x, \tau_z$  in the test data  $\mathcal{D}_{test}^T$  of the GDM group.

## 302 **F. Metrics**

303 The most important evaluation criterion is the extent to which the predicted glucose series  $\hat{y}$  is coincident with the actual  
304 observation series  $y$ . Therefore, we evaluated (1) the root mean squared error (RMSE) of the predicted series and (2) the mean  
305 absolute error (MAE). Additionally, we evaluated the degree of coincidence of (3) the area under the curve (AUC) and (4) the  
306 postprandial maximum value of the glucose series because these are well-known glycemc indicators for diabetes research [36].

$$(1) RMSE = \frac{1}{T} \sum_{t=\tau^*+1}^{\tau^*+T} (y_t - \hat{y}_t)^2$$

$$(2) MAE = \frac{1}{T} \sum_{t=\tau^*+1}^{\tau^*+T} |y_t - \hat{y}_t|$$

$$(3) ERR_{AUC} = \left| \sum_{t=\tau^*+1}^{\tau^*+T} y_t - \sum_{t=\tau^*+1}^{\tau^*+T} \hat{y}_t \right|$$

$$(4) ERR_{MAX} = \left| \max_t y_t - \max_t \hat{y}_t \right|$$

307

308 After calculating each metric following the above equations for all segment data included in the test data  $\mathcal{D}_{test}^{\mathbb{T}}$ , the average  
309 of the metric values among all segments was used as the final metric score.

## 310 Result

311 Table 1 presents the conclusive average metric scores for each model across segments both with and without postprandial  
312 exercise. Within this context, an exercise segment is delineated by an energy expenditure (EE) exceeding 60 kcal. Focusing  
313 initially on segments involving postprandial exercise, we observe that the synergetic model, trained through extended transfer  
314 learning with RCT data, achieves the highest performance. Additionally, the augmentation of performance is evident across  
315 both the additive and synergetic models due to extended transfer learning, affirming its efficacy. Notably, this enhancement is  
316 particularly pronounced in the synergetic model, attributed to its more intricate model structure. Conversely, across segments  
317 devoid of postprandial exercise, the metrics remain largely consistent across all models. This consistency aligns with  
318 expectations, given that the exercise effect ( $R_e$ ) within the additive or synergetic model approximates zero in the absence of  
319 postprandial exercise. Consequently, the forecasted glucose trajectory converges with that of the single model (Eq. 1-3).

320

321 **Table 1. Average metric scores with standard error.**

| Model                          | With postprandial exercise<br>(N=23) |                        |                          |                        | Without postprandial exercise<br>(N=528) |                 |                    |                    |
|--------------------------------|--------------------------------------|------------------------|--------------------------|------------------------|------------------------------------------|-----------------|--------------------|--------------------|
|                                | RMSE                                 | MAE                    | ERR <sub>AUC</sub>       | ERR <sub>MAX</sub>     | RMSE                                     | MAE             | ERR <sub>AUC</sub> | ERR <sub>MAX</sub> |
| $\mathcal{M}_{base}$           | 0.93<br>(±0.15)                      | 0.72<br>(±0.12)        | 62.64<br>(±13.30)        | 0.83<br>(±0.21)        | 0.89<br>(±0.02)                          | 0.68<br>(±0.02) | 54.37<br>(±2.03)   | 0.98<br>(±0.03)    |
| $\mathcal{M}_{add}$            | 0.92<br>(±0.14)                      | 0.70<br>(±0.11)        | 55.63<br>(±13.17)        | 0.78<br>(±0.17)        | 0.90<br>(±0.02)                          | 0.70<br>(±0.02) | 55.35<br>(±2.11)   | 1.01<br>(±0.04)    |
| $\mathcal{M}_{add+trans}$      | 0.92<br>(±0.14)                      | 0.70<br>(±0.11)        | 59.22<br>(±13.03)        | 0.81<br>(±0.19)        | 0.90<br>(±0.02)                          | 0.70<br>(±0.02) | 55.27<br>(±2.11)   | 1.00<br>(±0.04)    |
| $\mathcal{M}_{add+trans\_ext}$ | 0.86<br>(±0.14)                      | 0.66<br>(±0.11)        | 55.42<br>(±12.61)        | 0.79<br>(±0.20)        | 0.90<br>(±0.02)                          | 0.69<br>(±0.02) | 55.21<br>(±2.08)   | 1.00<br>(±0.03)    |
| $\mathcal{M}_{syn}$            | 1.18<br>(±0.25)                      | 0.87<br>(±0.17)        | 84.19<br>(±19.50)        | 0.87<br>(±0.18)        | 0.91<br>(±0.02)                          | 0.70<br>(±0.02) | 55.99<br>(±2.16)   | 1.02<br>(±0.04)    |
| $\mathcal{M}_{syn+trans}$      | 0.99<br>(±0.14)                      | 0.76<br>(±0.11)        | 68.14<br>(±13.02)        | 0.95<br>(±0.21)        | 0.90<br>(±0.02)                          | 0.70<br>(±0.02) | 55.50<br>(±2.15)   | 1.02<br>(±0.04)    |
| $\mathcal{M}_{syn+trans\_ext}$ | <b>0.85</b><br>(±0.13)               | <b>0.65</b><br>(±0.10) | <b>53.57</b><br>(±11.65) | <b>0.77</b><br>(±0.19) | 0.90<br>(±0.02)                          | 0.70<br>(±0.02) | 55.34<br>(±2.09)   | 1.00<br>(±0.04)    |

322

323 The variations in the projected glucose trajectory by the synergetic model for each training scheme are depicted in Fig 8.  
 324 Instances of (a) no transfer and (b) regular transfer reveal discrepancies between the projected value (dark pink line) and the  
 325 actual value (black dot). This discord stems from an overestimation of the exercise effect, which hampers the glucose response  
 326 induced by diet (light pink line) subsequent to exercise events (green bar). In contrast, Fig 8(c) showcases the efficacy of  
 327 extended transfer learning, encompassing a distributional shift from the RCT dataset. This approach ensures an appropriately  
 328 calibrated exercise effect in terms of intensity and timing, consequently yielding ameliorated prediction errors.

329

330 **Fig 8. Difference in predicted glucose trajectory with each training pattern.**

331 Furthermore, Fig 9 illustrates instances of projected trajectories by the single, additive, and synergetic models. Notably, the  
 332 glucose surge projected by the single model (a) exhibits a pronounced delay compared to the actual rise. This delay is likely  
 333 attributed to overfitting of dietary parameters due to the omission of the exercise effect. Contrastingly, the combined models  
 334 (b) and (c) aptly replicate the glucose elevation, demonstrating their success in addressing this aspect.

335

336 **Fig 9. Examples of trajectory predicted by each glucose model.**

337 These results demonstrate the effectiveness of our transfer learning framework with RCT data and the synergistic modelling  
 338 of dietary and exercise effects on glucose.

## 339 Discussion



340 An intrinsic strength of the proposed methodology lies in the transparency and visibility of the trained models and their  
341 parameters, as depicted in Fig 3. This transparency facilitates seamless incorporation into the formulation of personalized  
342 behavioral recommendations for individual patients. Moreover, the integration of transfer learning with randomized controlled  
343 trial (RCT) data notably amplifies this capability by refining model parameters with heightened precision. For example, if the  
344 absolute value of exercise parameter  $\beta_e$  in Eq. Five is estimated to be small in some patients, the exercise effect  $\mathcal{R}_e$  is not likely  
345 to appear easily, implying that recommendations regarding postprandial exercise should be of moderate (or higher) intensity.  
346 Here, Fig 10 shows actual examples of the posterior of the parameter  $\beta_e$  estimated for each healthy participant on the top and  
347 each patient on the bottom. As the example in Fig 8 belongs to patient P1 in Fig 10, we can confirm the overestimation of  $\beta_e$   
348 from Fig 10(a) and (b) at the bottom. In the context of practical recommendation scenarios, this tendency results in excessively  
349 optimistic and potentially detrimental suggestions, assuming a minor exercise could significantly enhance the patient's glucose  
350 profile. Yet, as depicted in Fig 10(c), this misalignment is rectified through extended transfer learning, facilitated by prior  
351 rescaling via the incorporation of shifting and shrinking operations outlined in Eq. 7. This underscores the efficacy of the  
352 proposed transfer learning technique, enabling the formulation of exercise recommendations that genuinely optimize  
353 postprandial glucose reduction for individual patients, thanks to the precise acquisition of parameters.

354

355 **Fig 10. Estimated distribution of parameter  $\beta_e$  for each patient.**

356 An additional advantage offered by the proposed transfer learning technique is its intrinsic ability to automatically establish  
357 a fitting prior distribution. Practical Bayesian modeling often entails substantial reliance on domain-specific knowledge for  
358 setting informative priors [31]. Nevertheless, acquiring such requisite knowledge for training intricate time-series models is  
359 notably challenging, given the nascent state of corresponding medical insights in numerous cases [32]. In response to this  
360 challenge, our approach empowers the creation of prior distributions with minimal domain knowledge, achieved through  
361 leveraging RCT data acquired via active intervention. Furthermore, due to the inherent simplicity of our devised framework  
362 (Fig 1), its applicability extends to glucose prediction for diverse patient cohorts and other complex prognostication tasks within  
363 the healthcare domain.

364 However, an intriguing and contentious issue revolves around determining the requisite volume of data for a dedicated RCT  
365 within our framework. Guided by the Law of Large Numbers, the greater the volume of RCT data amassed, the more balanced  
366 the target distribution becomes, consequently bolstering the robustness of parameter learning. Nevertheless, amassing a

367 substantial quantity of high-quality RCT data necessitates significant time and resources, given the demand for large-scale  
368 experimental endeavors.

369 Therefore, in practice, the amount of RCT data should be determined flexibly depending on the results of the convergence  
370 diagnosis in parameter learning. Here, the values of convergence indicator  $\hat{R}$  [31] for each parameter in  $\tilde{\Theta}^{\mathbb{S}} = (\tilde{\alpha}_d, \tilde{\beta}_d, \tilde{\alpha}_e, \tilde{\beta}_e, \tilde{C})$   
371 were (1.0001, 1.0040, 1.0017, 1.0008, 1.0013) for each, in our source task. Because  $\hat{R} < 1.1$  is conventionally considered that  
372 parameter learning converges, and the number of RCT could be sufficient to specify the posterior distribution of the parameters.

373 In our exploration of exercise's impact, our focus thus far has centered on the immediate reduction of glucose levels owing to  
374 muscular fatigue. However, insights gleaned from prior medical investigations [33] underscore a persistent, longer-term  
375 influence of exercise on enhancing insulin sensitivity and adeptly regulating blood glucose responses through repeated vigorous  
376 physical activity in patients' daily routines. In forthcoming endeavors, we aim to integrate these enduring exercise effects into  
377 our glucose prediction model, striving for optimal predictive accuracy and the formulation of tailored behavioral  
378 recommendations for patients. It's worth noting that other variables such as stress, sleep patterns, time zone disparities, dietary  
379 history, and medical conditions also exert influence on glucose trajectories [6,23,37]. To refine our predictions and model  
380 training, we intend to encompass these additional factors within our glucose modeling framework in future research.

## 381 **Conclusion**

382 We present an innovative transfer-learning framework utilizing randomized controlled trial (RCT) data for postprandial glucose  
383 prediction, integrating both dietary and exercise behaviors. The effectiveness of this framework was assessed using real-world  
384 data collected from 68 patients with gestational diabetes mellitus (GDM) in their everyday settings. The evaluation conclusively  
385 demonstrates performance enhancement in postprandial glucose prediction through the implementation of our proposed transfer  
386 learning approach. Our findings also underscore the superior accuracy of the synergetic model compared to the additive model  
387 in modeling combined factors. Moving forward, our research aims to incorporate the prolonged glycemic impact of exercise  
388 routines to forge a superior predictive model for tailored recommendations. Additionally, we will extend the application of this  
389 framework to various prediction tasks to gauge its adaptability and versatility in future.

## 390 **Acknowledgments**

391 The authors would like to thank Çağlar Hızlı and Arina Odnoblyudova for useful technical discussions. We also would like to  
392 thank Editage for English language editing.

## 393 References

- 394 1. Bommer C, Sagalova V, Heeseemann E, Manne-Goehler J, Atun R, Bärnighausen T, Davies J, Vollmer S. Global  
395 Economic Burden of Diabetes in Adults: Projections From 2015 to 2030. *Diabetes Care*. 2018 May;41(5):963-970. doi:  
396 10.2337/dc17-1962. Epub 2018 Feb 23. PMID: 29475843.
- 397 2. Kytö M, Koivusalo S, Ruonala A, Strömberg L, Tuomonen H, Heinonen S, Jacucci G. Behavior Change App for Self-  
398 management of Gestational Diabetes: Design and Evaluation of Desirable Features. *JMIR Hum Factors*. 2022 Oct  
399 12;9(4):e36987. doi: 10.2196/36987. PMID: 36222806; PMCID: PMC9607927.
- 400 3. Ramakrishnan P, Yan K, Balijepalli C, Druyts E. Changing face of healthcare: digital therapeutics in the management  
401 of diabetes. *Curr Med Res Opin*. 2021 Dec;37(12):2089-2091. doi: 10.1080/03007995.2021.1976737. Epub 2021 Sep  
402 23. PMID: 34511002.
- 403 4. Kytö M, Markussen LT, Marttinen P, Jacucci G, Niinistö S, Virtanen SM, Korhonen TE, Sievänen H, Vähä-Ypyä H,  
404 Korhonen I, Heinonen S, Koivusalo SB. Comprehensive self-tracking of blood glucose and lifestyle with a mobile  
405 application in the management of gestational diabetes: a study protocol for a randomised controlled trial (eMOM GDM  
406 study). *BMJ Open*. 2022 Nov 7;12(11):e066292. doi: 10.1136/bmjopen-2022-066292. PMID: 36344008; PMCID:  
407 PMC9644362.
- 408 5. Oviedo S, Vehí J, Calm R, Armengol J. A review of personalized blood glucose prediction strategies for T1DM  
409 patients. *Int J Numer Method Biomed Eng*. 2017 Jun;33(6). doi: 10.1002/cnm.2833. Epub 2016 Oct 28. PMID:  
410 27644067.
- 411 6. Woldaregay AZ, Årsand E, Walderhaug S, Albers D, Mamykina L, Botsis T, Hartvigsen G. Data-driven modeling and  
412 prediction of blood glucose dynamics: Machine learning applications in type 1 diabetes. *Artif Intell Med*. 2019  
413 Jul;98:109-134. doi: 10.1016/j.artmed.2019.07.007. Epub 2019 Jul 26. PMID: 31383477.
- 414 7. Jankovic MV, Mosimann S, Bally L, Stettler C, Mougiakakou S. Deep prediction model: The case of online adaptive  
415 prediction of subcutaneous glucose. 2016 13th Symposium on Neural Networks and Applications (NEUREL),  
416 Belgrade, Serbia, 2016, doi: 10.1109/NEUREL.2016.7800095.
- 417 8. Faruqi SHA, Du Y, Meka R, Alaeddini A, Li C, Shirinkam S, Wang J. Development of a Deep Learning Model for  
418 Dynamic Forecasting of Blood Glucose Level for Type 2 Diabetes Mellitus: Secondary Analysis of a Randomized  
419 Controlled Trial. *JMIR Mhealth Uhealth*. 2019 Nov 1;7(11):e14452. doi: 10.2196/14452. PMID: 31682586; PMCID:  
420 PMC6858613.
- 421 9. Shepherd E, Gomersall JC, Tieu J, Han S, Crowther CA, Middleton P. Combined diet and exercise interventions for  
422 preventing gestational diabetes mellitus. *Cochrane Database Syst Rev*. 2017 Nov 13;11(11):CD010443. doi:  
423 10.1002/14651858.CD010443.pub3. PMID: 29129039; PMCID: PMC6485974.
- 424 10. Allehdan SS, Basha AS, Asali FF, Tayyem RF. Dietary and exercise interventions and glycemic control and maternal  
425 and newborn outcomes in women diagnosed with gestational diabetes: Systematic review. *Diabetes Metab Syndr*. 2019  
426 Jul-Aug;13(4):2775-2784. doi: 10.1016/j.dsx.2019.07.040. Epub 2019 Jul 25. PMID: 31405707.
- 427 11. Coe DP, Conger SA, Kendrick JM, Howard BC, Thompson DL, Bassett DR Jr, White JD. Postprandial walking reduces  
428 glucose levels in women with gestational diabetes mellitus. *Appl Physiol Nutr Metab*. 2018 May;43(5):531-534. doi:  
429 10.1139/apnm-2017-0494. Epub 2017 Dec 22. PMID: 29272606.
- 430 12. Manohar C, Levine JA, Nandy DK, Saad A, Dalla Man C, McCrady-Spitzer SK, Basu R, Cobelli C, Carter RE, Basu  
431 A, Kudva YC. The effect of walking on postprandial glycemic excursion in patients with type 1 diabetes and healthy  
432 people. *Diabetes Care*. 2012 Dec;35(12):2493-9. doi: 10.2337/dc11-2381. Epub 2012 Aug 8. PMID: 22875231;  
433 PMCID: PMC3507567.
- 434 13. Borrer A, Zieff G, Battaglini C, Stoner L. The Effects of Postprandial Exercise on Glucose Control in Individuals with  
435 Type 2 Diabetes: A Systematic Review. *Sports Med*. 2018 Jun;48(6):1479-1491. doi: 10.1007/s40279-018-0864-x.  
436 PMID: 29396781.
- 437 14. De Bois M, El Yacoubi MA, Ammi M. Adversarial multi-source transfer learning in healthcare: Application to glucose  
438 prediction for diabetic people. *Comput Methods Programs Biomed*. 2021 Feb;199:105874. doi:  
439 10.1016/j.cmpb.2020.105874. Epub 2020 Nov 30. PMID: 33333366.

- 440 15. Yu X, Yang T, Lu J, Shen Y, Lu W, Zhu W, et al. Deep transfer learning: a novel glucose prediction framework for  
441 new subjects with type 2 diabetes. *Complex Intell. Syst.* 8, 1875–1887 (2022). doi: 10.1007/s40747-021-00360-7.
- 442 16. Deng Y, Lu L, Aponte L, Angelidi AM, Novak V, Karniadakis GE, Mantzoros CS. Deep transfer learning and data  
443 augmentation improve glucose levels prediction in type 2 diabetes patients. *NPJ Digit Med.* 2021 Jul 14;4(1):109. doi:  
444 10.1038/s41746-021-00480-x. PMID: 34262114; PMCID: PMC8280162.
- 445 17. Xie J, Wang Q. A Data-Driven Personalized Model of Glucose Dynamics Taking Account of the Effects of Physical  
446 Activity for Type 1 Diabetes: An In Silico Study. *J Biomech Eng.* 2019 Jan 1;141(1). doi: 10.1115/1.4041522. PMID:  
447 30458503.
- 448 18. Georga EI, Protopappas VC, Ardigo D, Marina M, Zavaroni I, Polyzos D, Fotiadis DI. Multivariate prediction of  
449 subcutaneous glucose concentration in type 1 diabetes patients based on support vector regression. *IEEE J Biomed*  
450 *Health Inform.* 2013 Jan;17(1):71-81. doi: 10.1109/TITB.2012.2219876. Epub 2012 Sep 19. PMID: 23008265.
- 451 19. Balakrishnan NP, Samavedham L, Rangaiah GP. Personalized mechanistic models for exercise, meal and insulin  
452 interventions in children and adolescents with type 1 diabetes. *J Theor Biol.* 2014 Sep 21;357:62-73. doi:  
453 10.1016/j.jtbi.2014.04.038. Epub 2014 May 11. PMID: 24828465.
- 454 20. Xuan J, Lu J, Zhang G. Bayesian transfer learning: An overview of probabilistic graphical models for transfer learning.  
455 2021. arXiv preprint arXiv:2109.13233.
- 456 21. Daniels J, Herrero P, Georgiou P. A Multitask Learning Approach to Personalized Blood Glucose Prediction. *IEEE J*  
457 *Biomed Health Inform.* 2022 Jan;26(1):436-445. doi: 10.1109/JBHI.2021.3100558. Epub 2022 Jan 17. PMID:  
458 34314367.
- 459 22. Gallwitz B. Implications of postprandial glucose and weight control in people with type 2 diabetes: understanding and  
460 implementing the International Diabetes Federation guidelines. *Diabetes Care.* 2009 Nov;32 Suppl 2(Suppl 2):S322-5.  
461 doi: 10.2337/dc09-S331. PMID: 19875573; PMCID: PMC2811482.
- 462 23. Pustozarov EA, Tkachuk AS, Vasukova EA, Anopova AD, Kokina MA, Gorelova IV, et al. Machine Learning  
463 Approach for Postprandial Blood Glucose Prediction in Gestational Diabetes Mellitus. *IEEE Access.* 2020;8:219308-  
464 219321. doi: 10.1109/ACCESS.2020.3042483.
- 465 24. Ashrafi RA, Ahola AJ, Rosengård-Bärlund M, Saarinen T, Heinonen S, Juuti A, Marttinen P, Pietiläinen KH.  
466 Computational modelling of self-reported dietary carbohydrate intake on glucose concentrations in patients undergoing  
467 Roux-en-Y gastric bypass versus one-anastomosis gastric bypass. *Ann Med.* 2021 Dec;53(1):1885-1895. doi:  
468 10.1080/07853890.2021.1964035. PMID: 34714211; PMCID: PMC8567939.
- 469 25. Zhang G, Ashrafi RA, Juuti A, Pietiläinen K, Marttinen P. Errors-in-Variables Modeling of Personalized Treatment-  
470 Response Trajectories. *IEEE J Biomed Health Inform.* 2021 Jan;25(1):201-208. doi: 10.1109/JBHI.2020.2987323.  
471 Epub 2021 Jan 5. PMID: 32324579.
- 472 26. Bellini A, Nicolò A, Bazzucchi I, Sacchetti M. The Effects of Postprandial Walking on the Glucose Response after  
473 Meals with Different Characteristics. *Nutrients.* 2022 Mar 4;14(5):1080. doi: 10.3390/nu14051080. PMID: 35268055;  
474 PMCID: PMC8912639.
- 475 27. Erickson ML, Jenkins NT, McCully KK. Exercise after You Eat: Hitting the Postprandial Glucose Target. *Front*  
476 *Endocrinol (Lausanne).* 2017 Sep 19;8:228. doi: 10.3389/fendo.2017.00228. PMID: 28974942; PMCID:  
477 PMC5610683.
- 478 28. Shwartz-Ziv R, Goldblum M, Sourì H, Kapoor S, Zhu C, LeCun Y, Wilson AG. Pre-train your loss: Easy bayesian  
479 transfer learning with informative priors. In *Advances in Neural Information Processing Systems.* 42. doi:  
480 10.48550/arXiv.2205.10279.
- 481 29. DeFronzo RA. Lilly lecture 1987. The triumvirate: beta-cell, muscle, liver. A collusion responsible for NIDDM.  
482 *Diabetes.* 1988 Jun;37(6):667-87. doi: 10.2337/diab.37.6.667. PMID: 3289989.
- 483 30. Andersen MB, Fuglsang J, Ostenfeld EB, Poulsen CW, Daugaard M, Ovesen PG. Postprandial interval walking-effect  
484 on blood glucose in pregnant women with gestational diabetes. *Am J Obstet Gynecol MFM.* 2021 Nov;3(6):100440.  
485 doi: 10.1016/j.ajogmf.2021.100440. Epub 2021 Jun 30. PMID: 34216833.
- 486 31. Gelman A, Carlin JB, Stern HS, Dunson DB, Vehtari A, Rubin DB. *Bayesian Data Analysis.* CRC Press. 2013. doi:  
487 10.1201/b16018.
- 488 32. Nahum-Shani I, Smith SN, Spring BJ, Collins LM, Witkiewitz K, Tewari A, Murphy SA. Just-in-Time Adaptive  
489 Interventions (JITAI) in Mobile Health: Key Components and Design Principles for Ongoing Health Behavior  
490 Support. *Ann Behav Med.* 2018 May 18;52(6):446-462. doi: 10.1007/s12160-016-9830-8. PMID: 27663578; PMCID:  
491 PMC5364076.
- 492 33. Gillen JB, Estafanos S, Govette A. Exercise-nutrient interactions for improved postprandial glycemic control and  
493 insulin sensitivity. *Appl Physiol Nutr Metab.* 2021 Aug;46(8):856-865. doi: 10.1139/apnm-2021-0168. Epub 2021 Jun  
494 3. PMID: 34081875.
- 495 34. Yu J, Lee SH, Kim MK. Recent Updates to Clinical Practice Guidelines for Diabetes Mellitus. *Endocrinol Metab*

- 496 (Seoul). 2022 Feb;37(1):26-37. doi: 10.3803/EnM.2022.105. Epub 2022 Feb 28. PMID: 35255599; PMCID:  
497 PMC8901964.
- 498 35. Stan Development Team (2023). “RStan: the R interface to Stan.” R package version 2.21.8, <https://mc-stan.org/>.
- 499 36. Rodbard D. Glucose Variability: A Review of Clinical Applications and Research Developments. *Diabetes Technol*  
500 *Ther.* 2018 Jun;20(S2):S25-S215. doi: 10.1089/dia.2018.0092. PMID: 29916742.
- 501 37. Pustozarov E, Popova P, Tkachuk A, Bolotko Y, Yuldashev Z, Grineva E. Development and Evaluation of a Mobile  
502 Personalized Blood Glucose Prediction System for Patients With Gestational Diabetes Mellitus. *JMIR Mhealth*  
503 *Uhealth.* 2018 Jan 9;6(1):e6. doi: 10.2196/mhealth.9236. PMID: 29317385; PMCID: PMC5780619.
- 504 38. Currie S, Sinclair M, Murphy MH, Madden E, Dunwoody L, Liddle D. Reducing the Decline in Physical Activity  
505 during Pregnancy: A Systematic Review of Behaviour Change Interventions. *PLoS One* 2013;8(6).
- 506 39. Soma-Pillay P, Nelson-Piercy C, Tolppanen H, Mebazaa A. Physiological changes in pregnancy. *Cardiovasc J Afr.*  
507 2016 Mar-Apr;27(2):89-94. doi: 10.5830/CVJA-2016-021. PMID: 27213856; PMCID: PMC4928162.
- 508
- 509

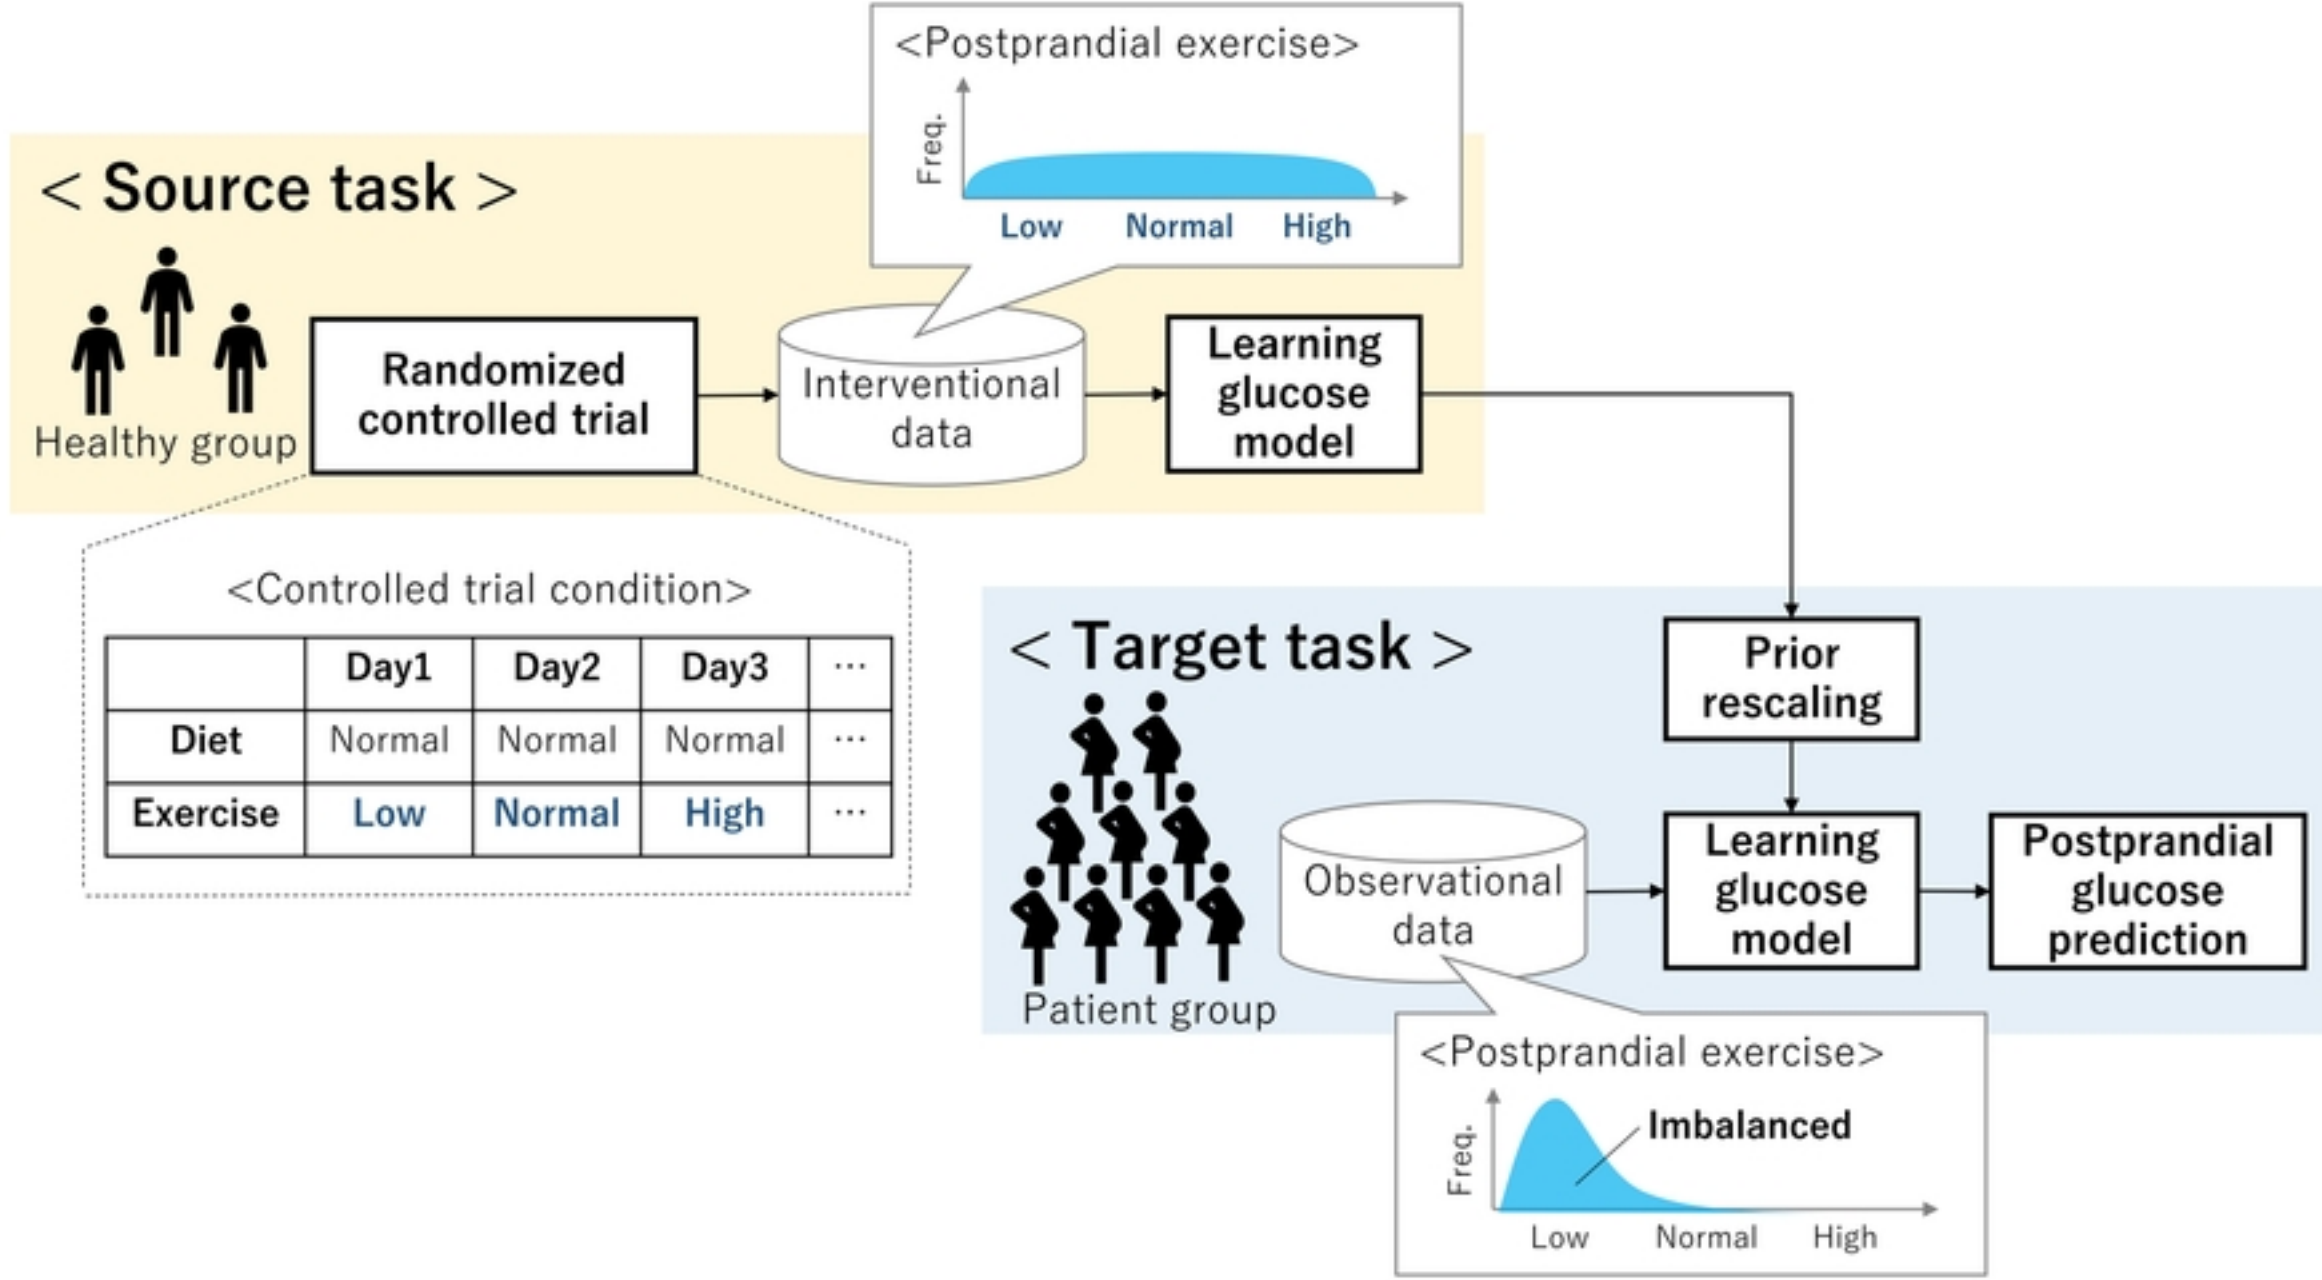

Figure1

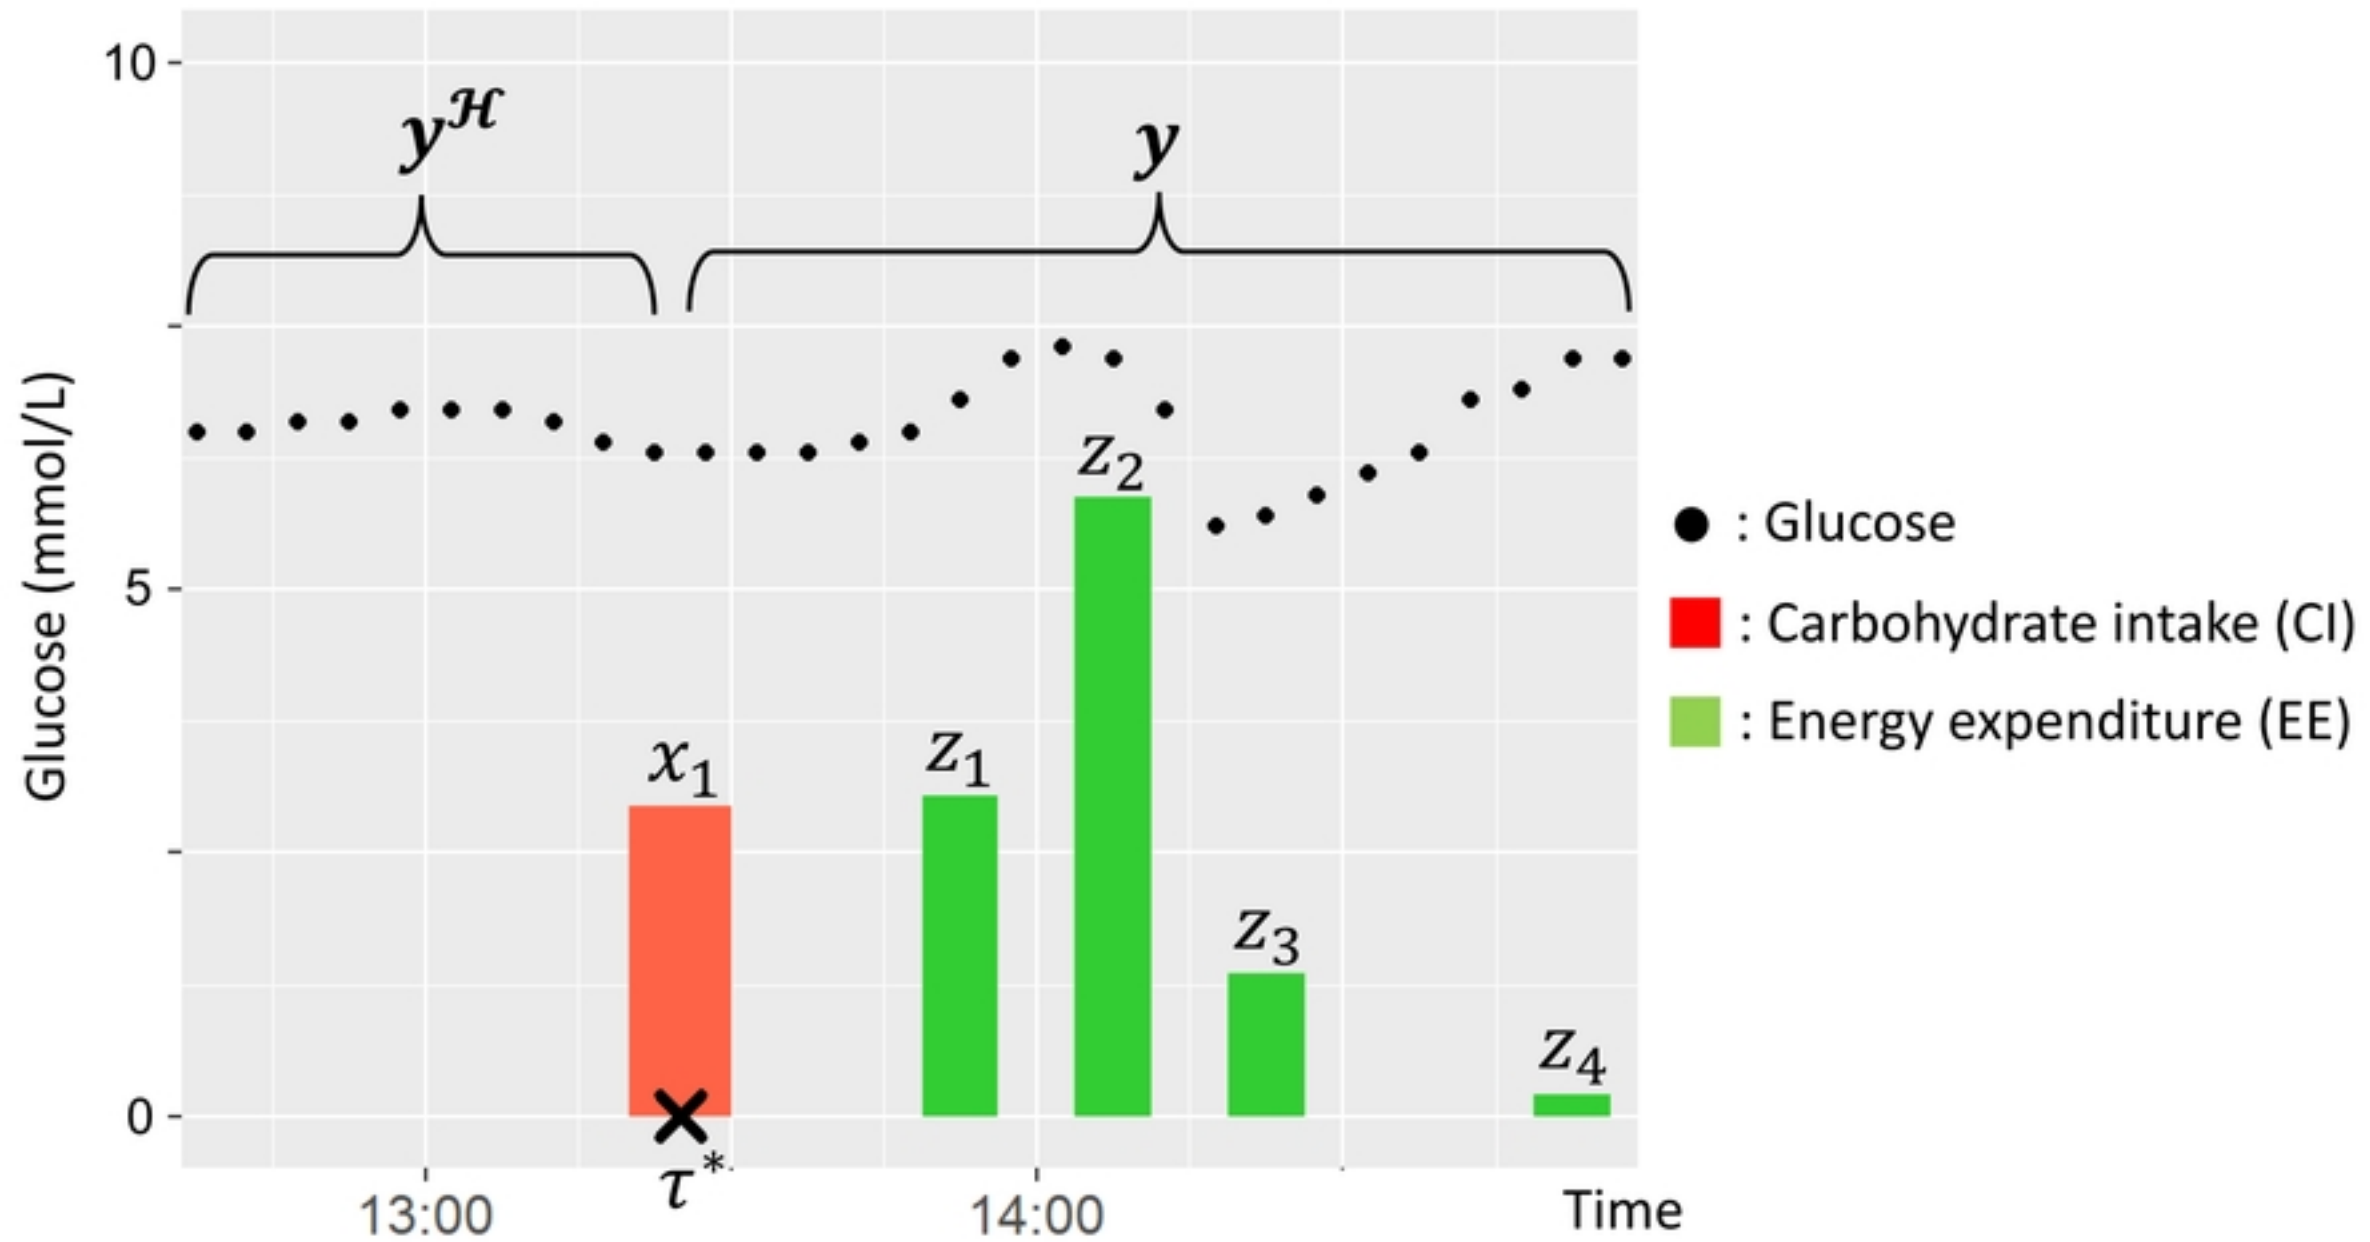

Figure2

Each group

Each person

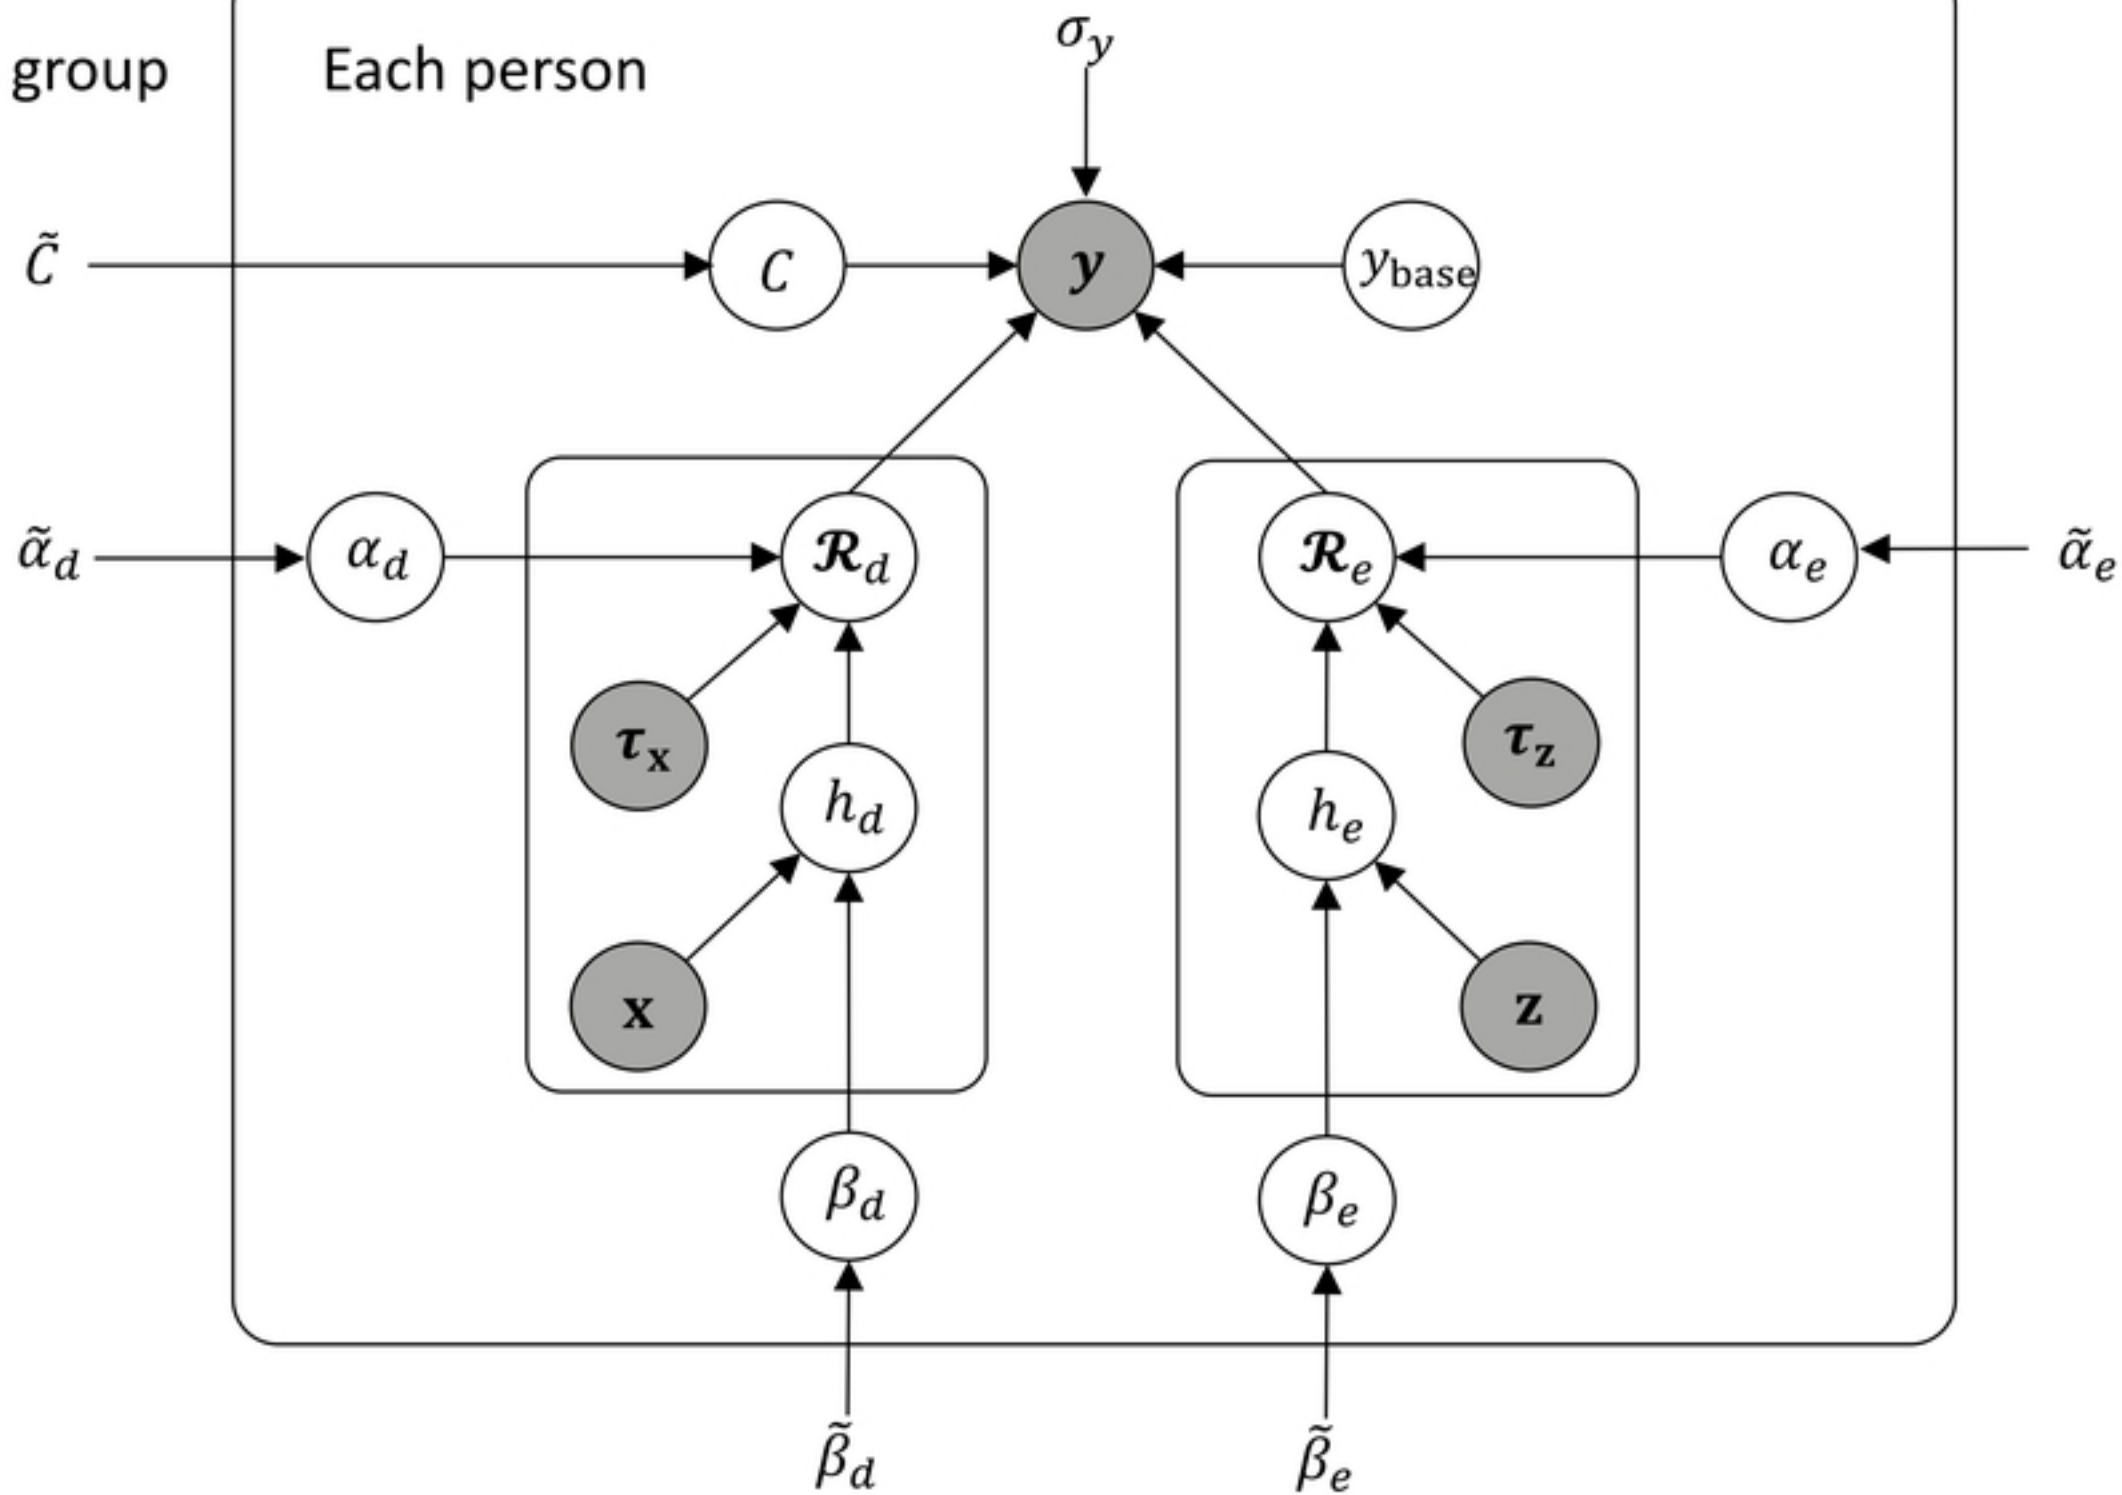

Figure3



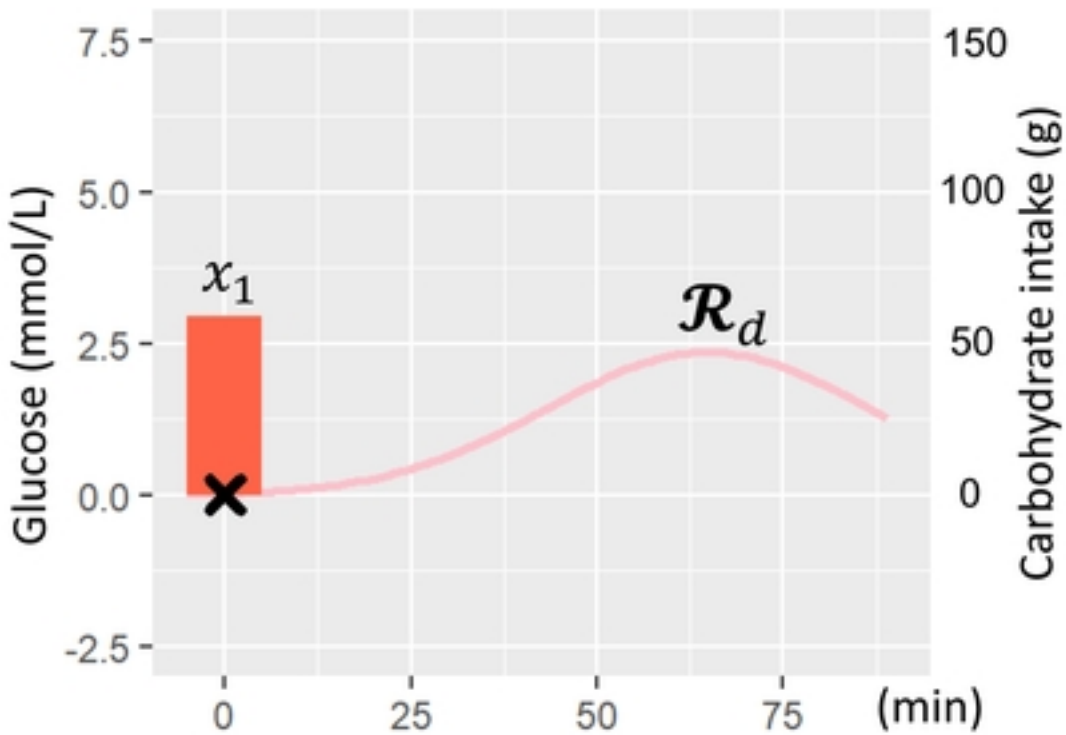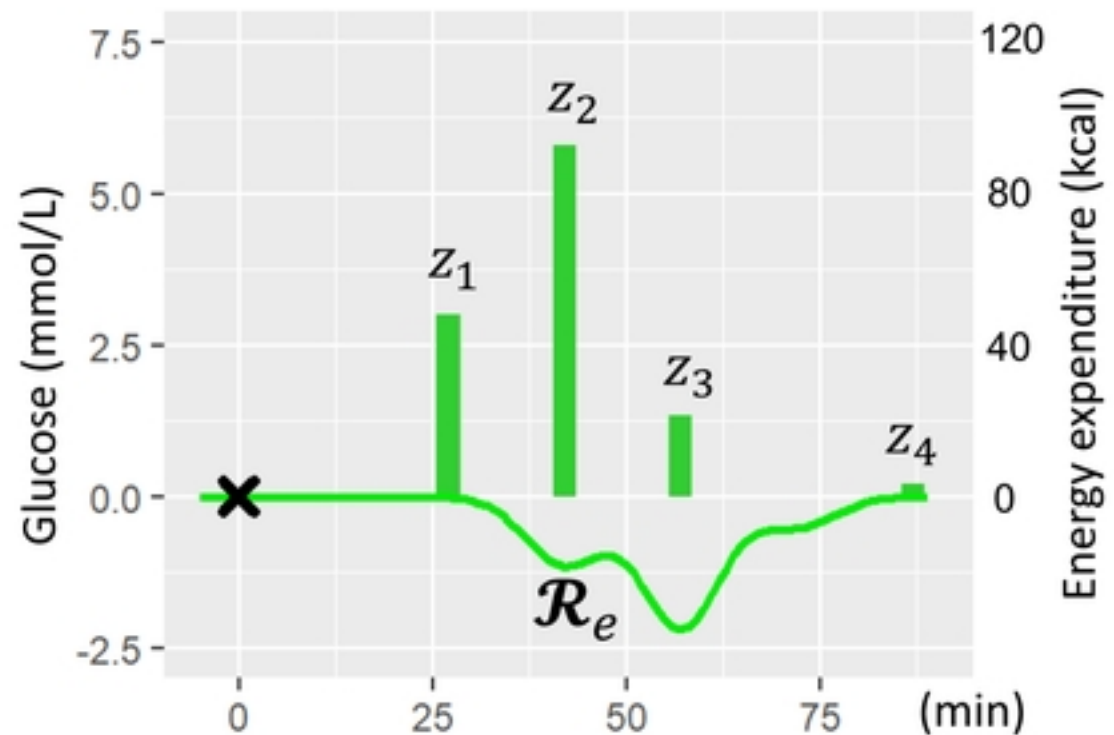

Figure4

(i) Source task

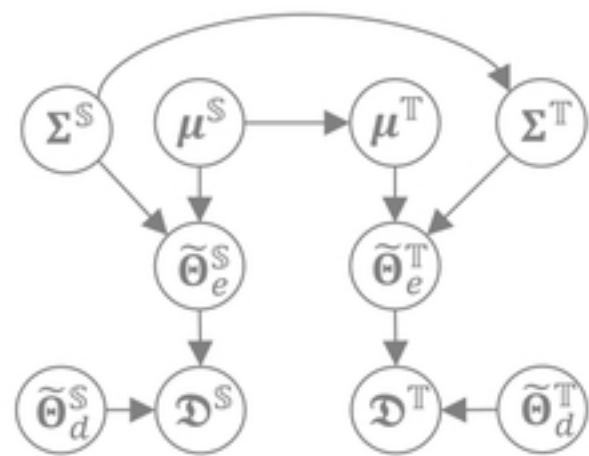

(ii) Target task

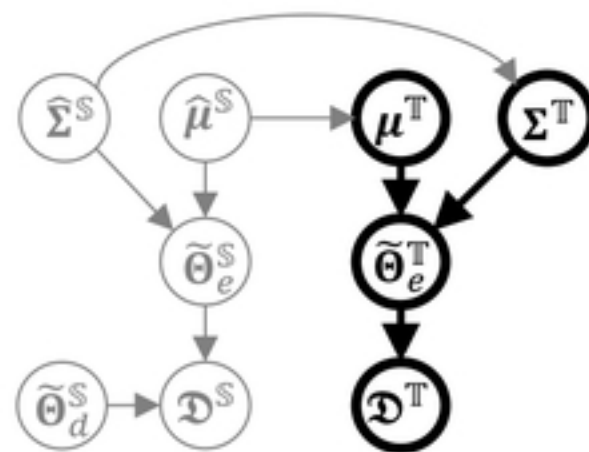

(a) No transfer

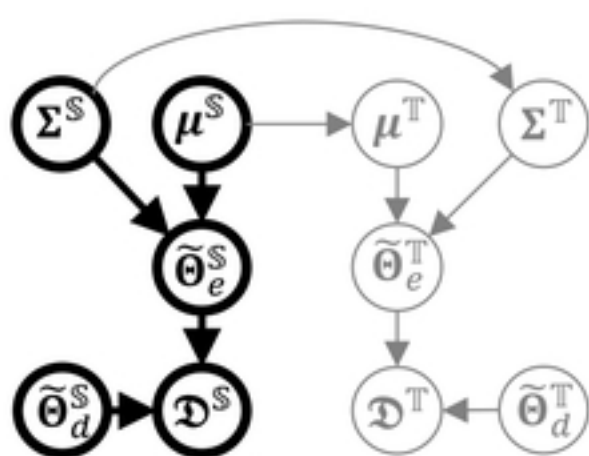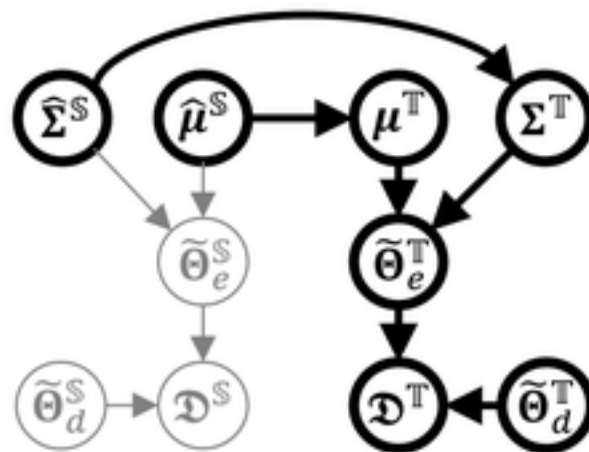

(b) Normal transfer

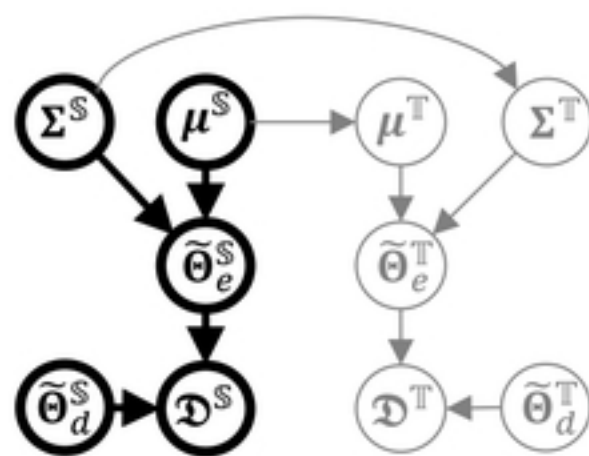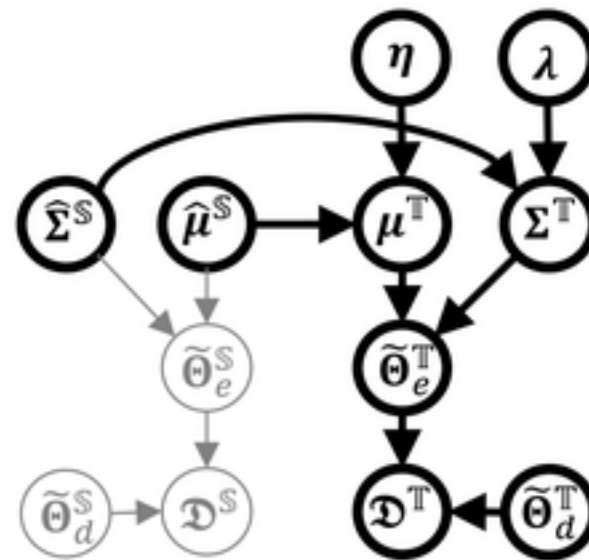

(c) Extended transfer

Figure 5

● : Glucose

■ : Energy expenditure (EE)

■ : Carbohydrate intake (CI)

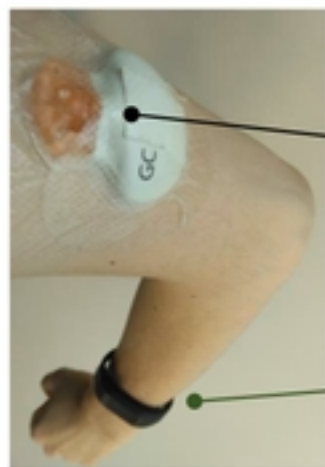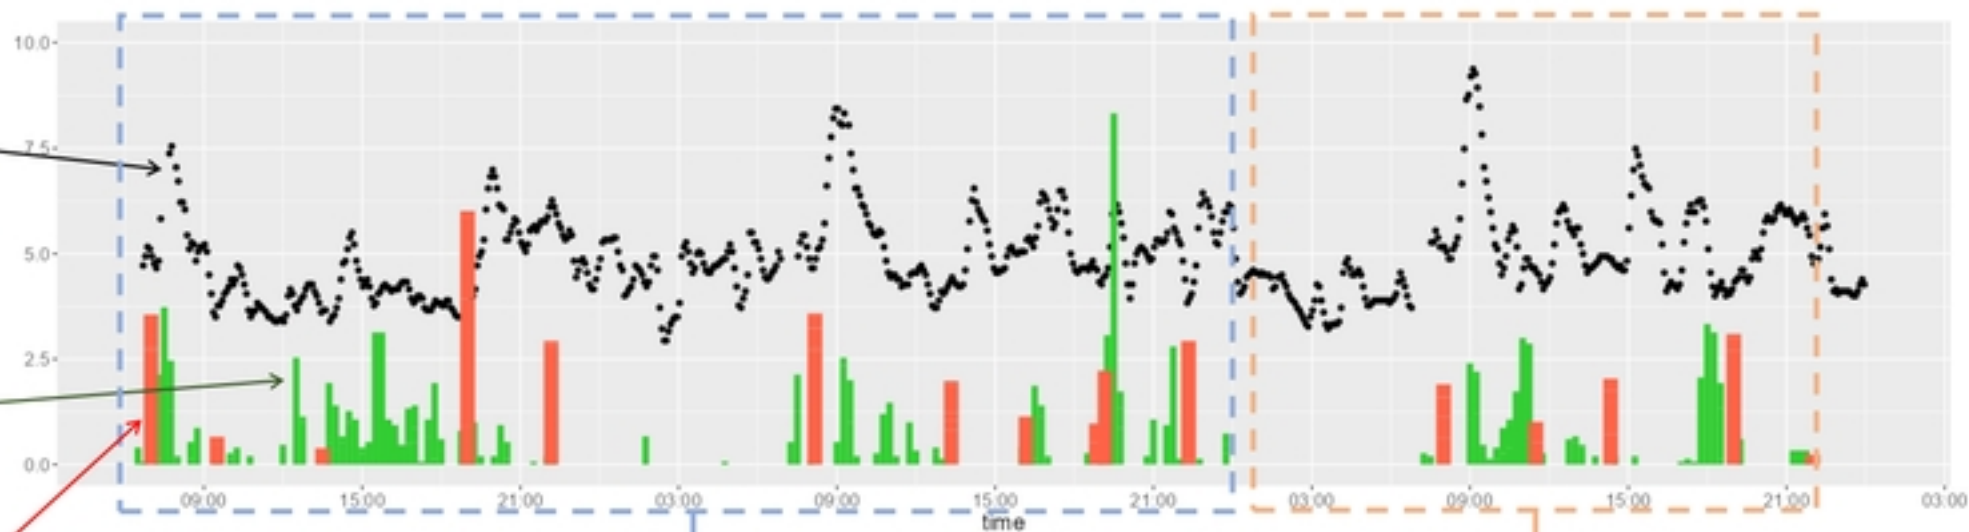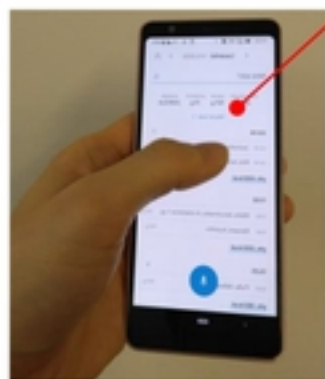

Preprocessing

[ Train data ]

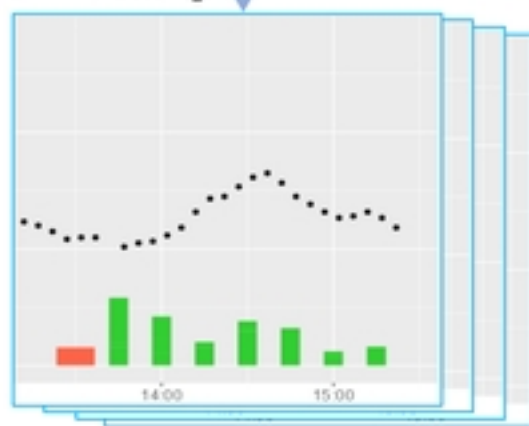

[ Test data ]

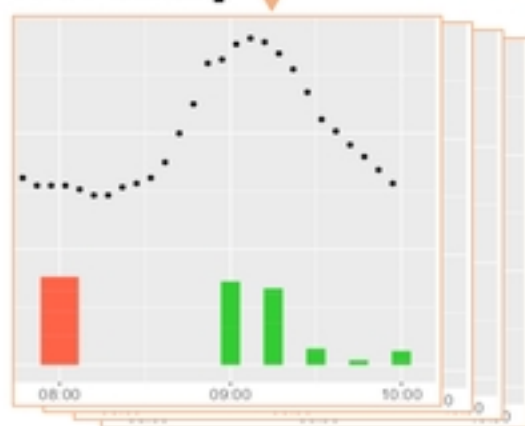

Figure6

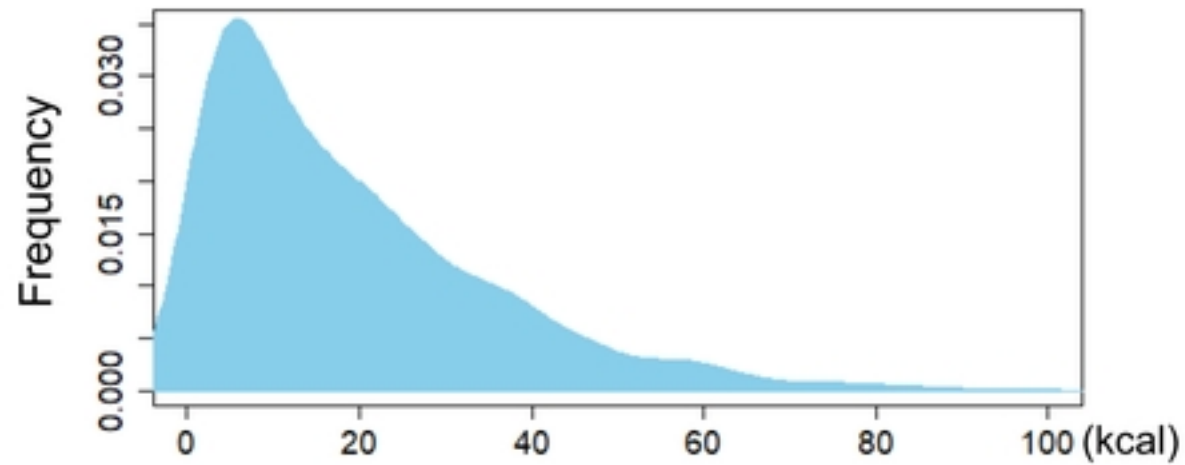

(a) GDM patient group

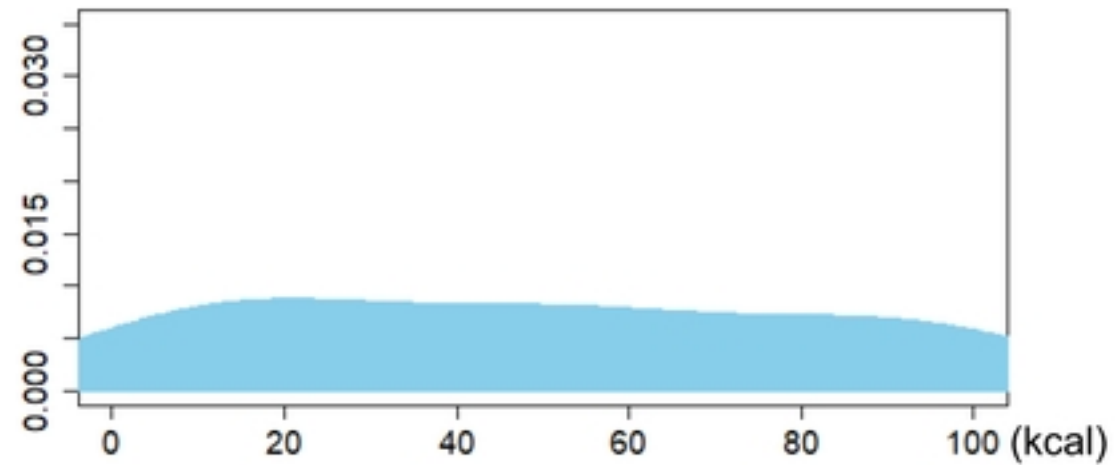

(b) Controlled healthy group

Figure7

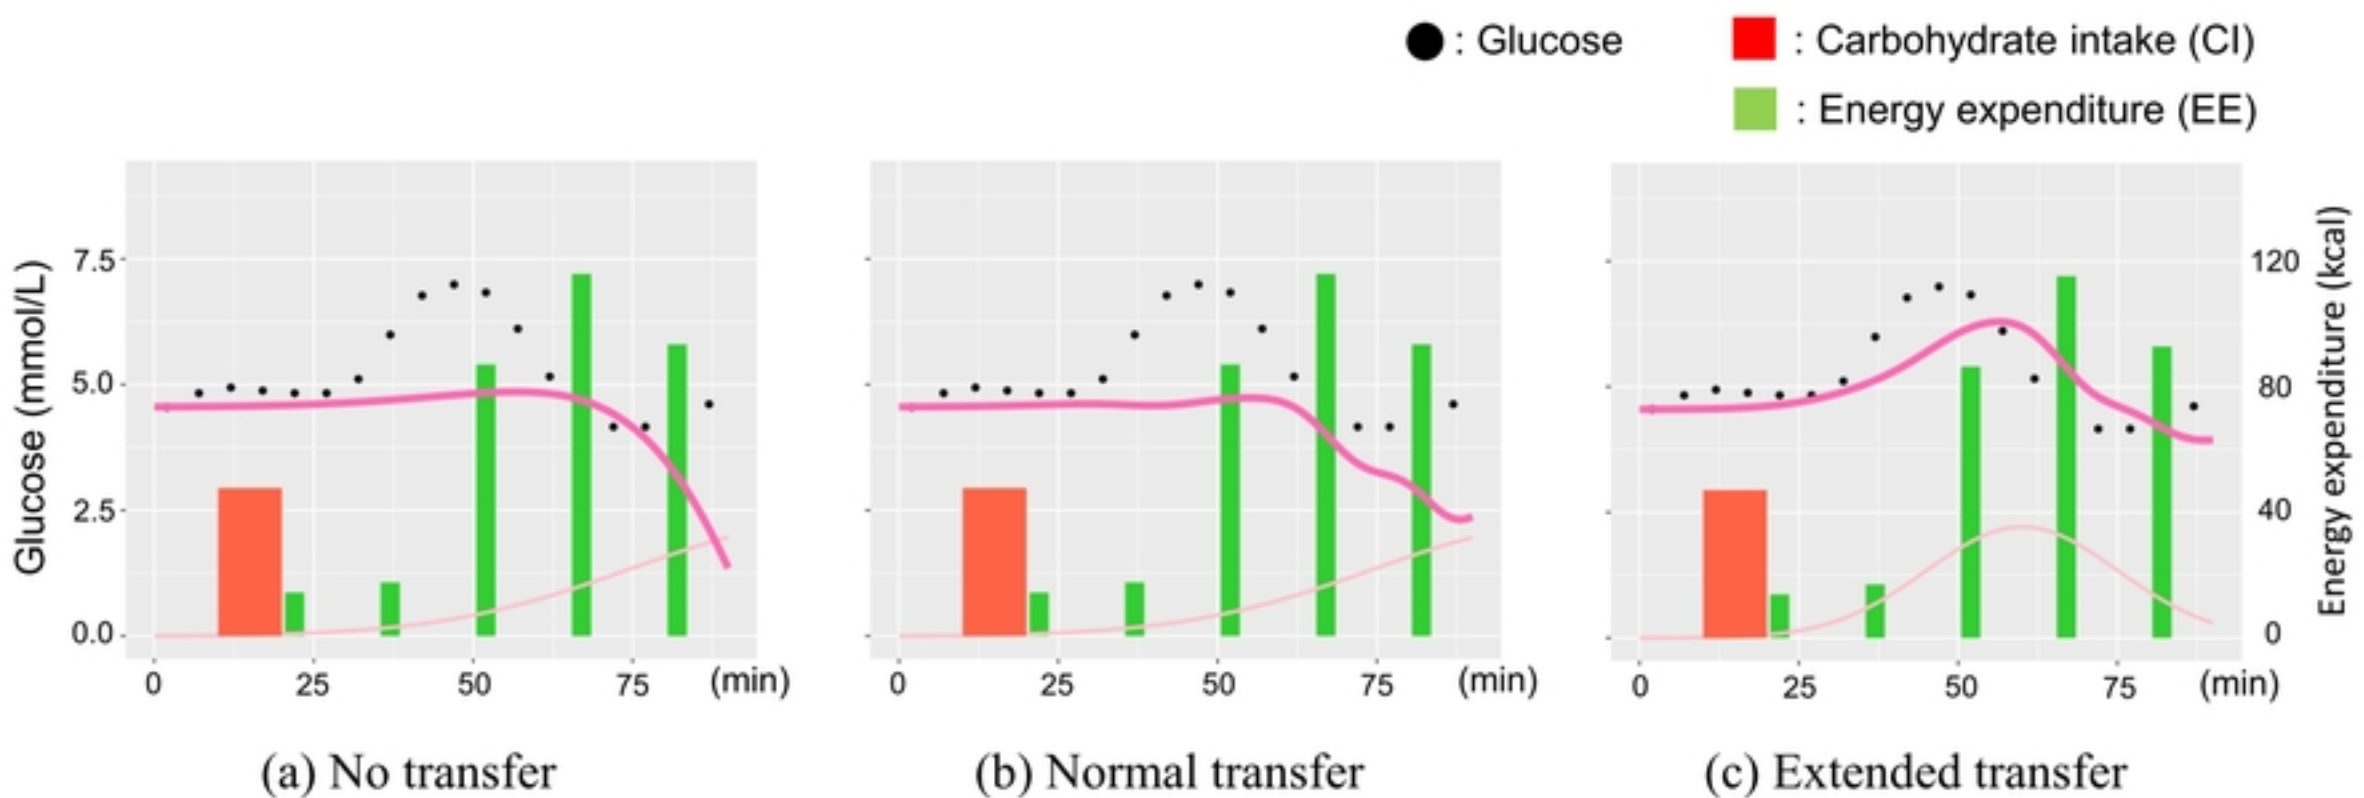

Figure8

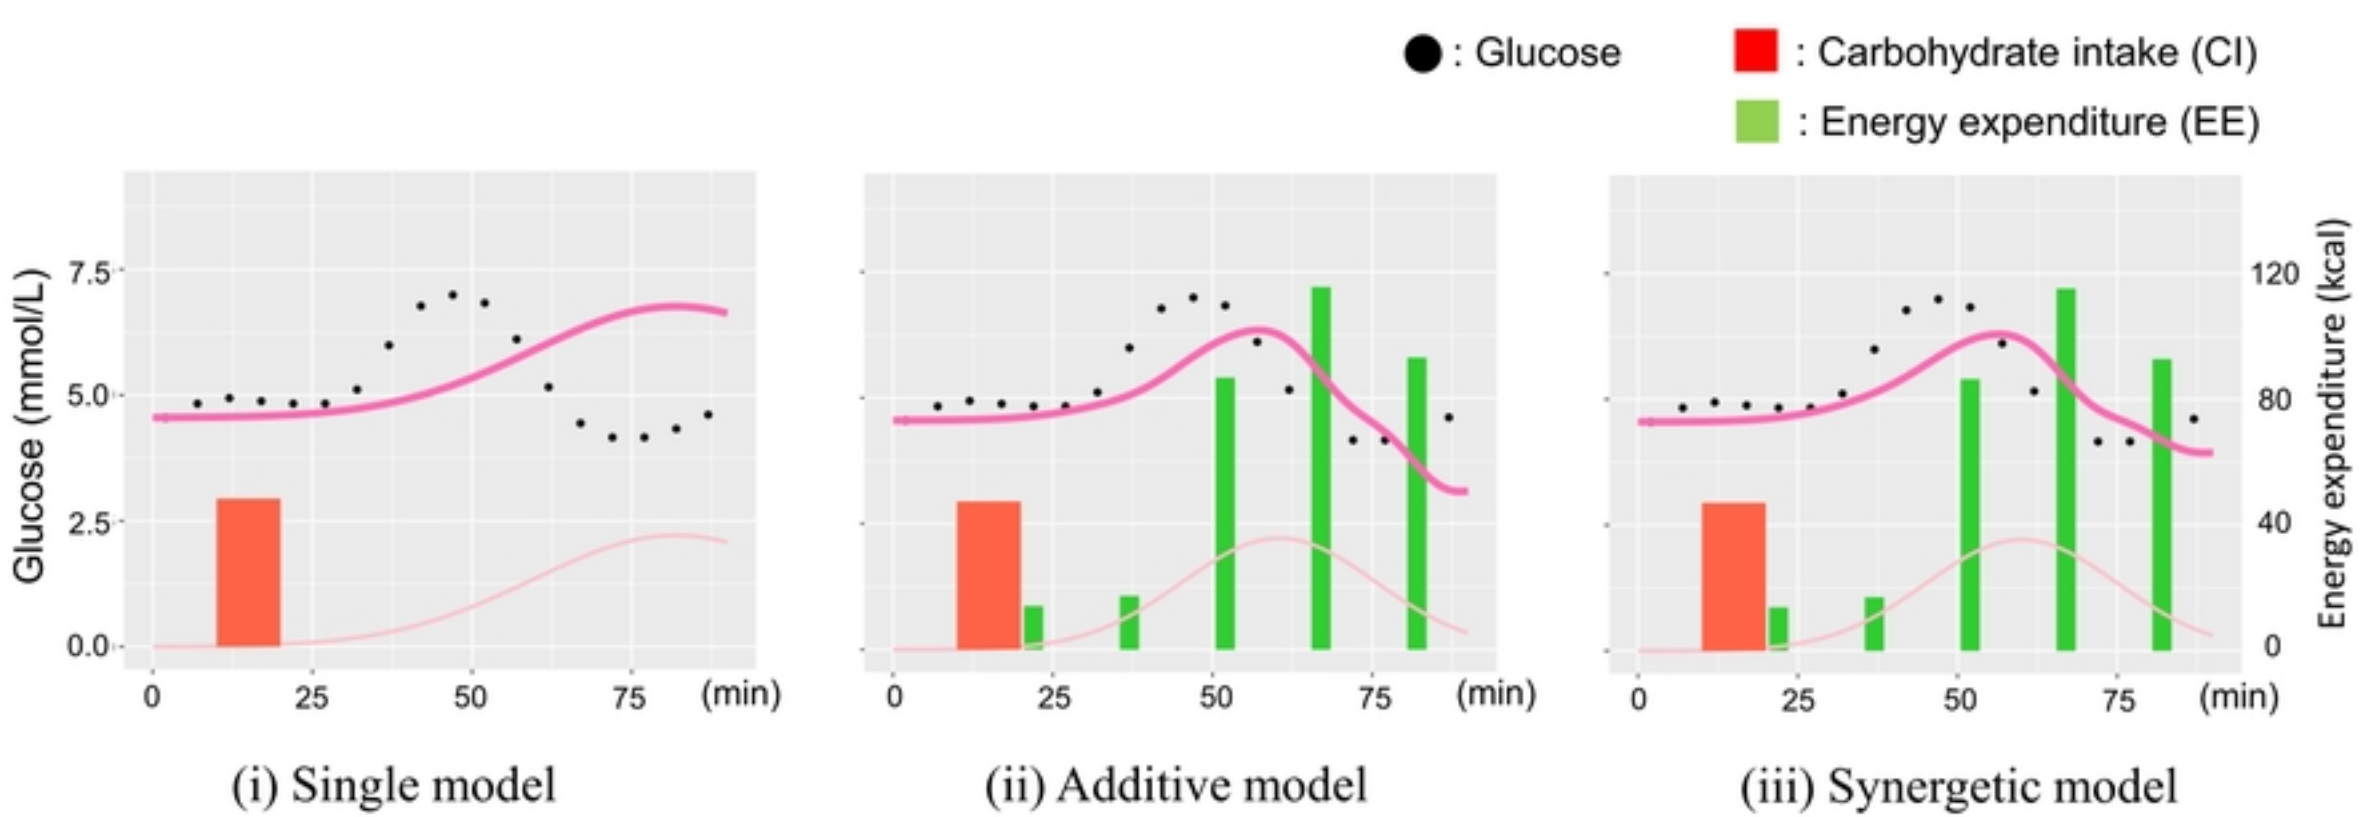

Figure9

(i) Source task

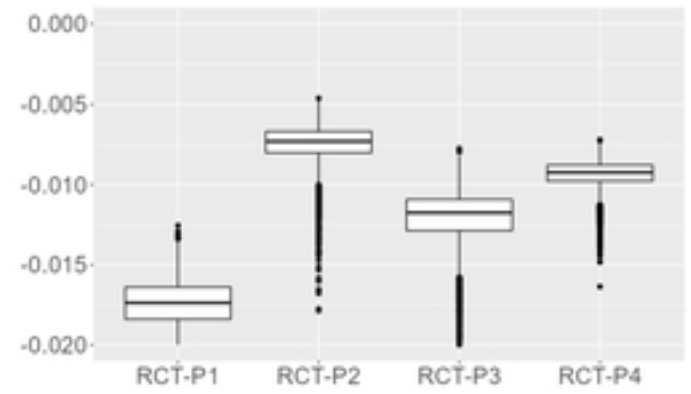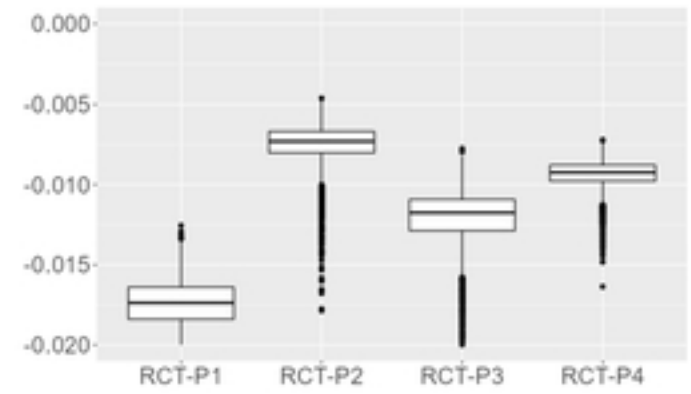

(ii) Target task

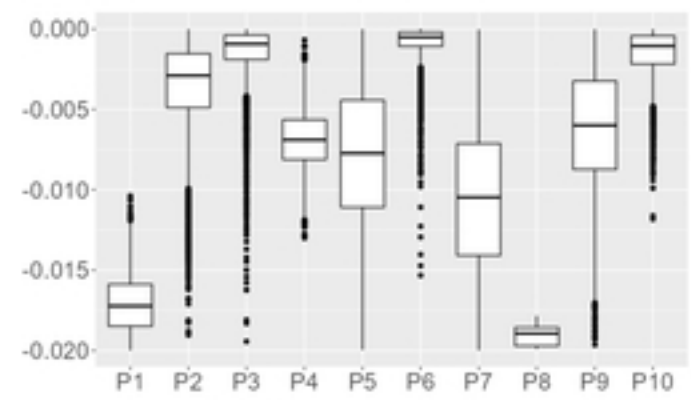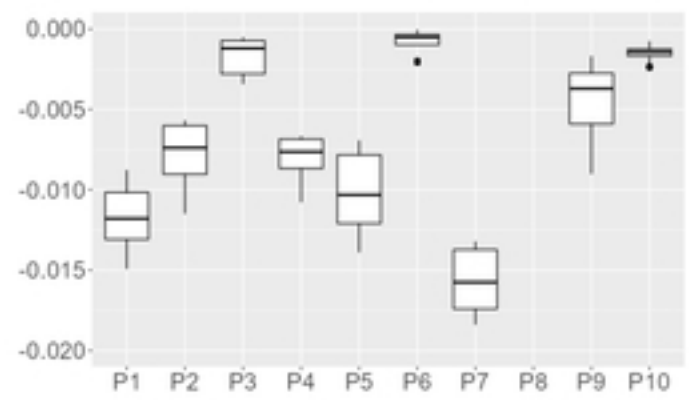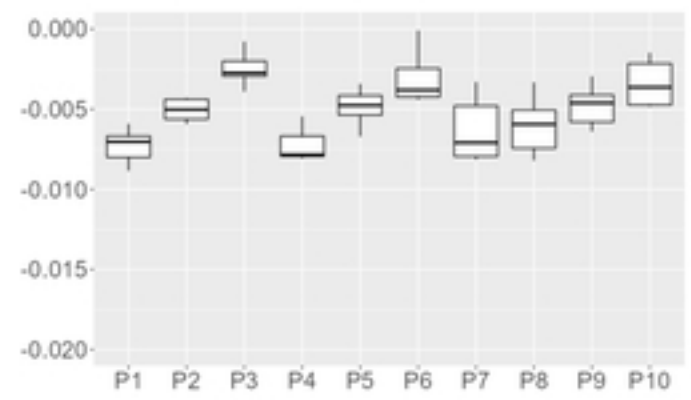

(a) No transfer

(b) Normal transfer

(c) Extended transfer

Figure10
